# Supplementary material for: Spatiotemporal variation in the risk of out-of-hospital cardiac arrests in Queensland, Australia
Source: PubMed Central journal article supplement — Resusc Plus. 2021 Sep 21;8:100166. doi: 10.1016/j.resplu.2021.100166 (PMC8463902; doi:10.1016/j.resplu.2021.100166), 2021-09-21
Supplement: mmc1.pdf [file mmc1.pdf]

# **Spatiotemporal variation in the risk of out-of-hospital cardiac arrests in Queensland, Australia**

Tan N Doan, Daniel Wilson, Stephen Rashford, Stephen Ball, Emma Bosley

## **Supplementary Materials**

### **Bayesian analysis**

We employed the models of Peluso et al.<sup>1</sup> and Auricchio et al.<sup>2</sup> that accounted for spatial heterogeneity, temporal heterogeneity, space-time interactions and demographic features. We chose local government areas (LGA) boundaries to be the spatial cells, motivated by the fact that annual demographic data on total population and age composition by sex were available and complete at the LGA level. A finer grid, for example at suburb level, would have posed challenges with regards to missing suburb-specific demographic data, extensive computation times, and overcrowded maps.

Let  $Y_{it}$  be the observed number of out-of-hospital cardiac arrest (OHCA) cases occurring in LGA  $i$  for year  $t$ , where  $i = (1, \dots, 78)$  for the 78 LGAs, and  $t = (t_1, \dots, T)$  with  $t_1 = 2007$  and  $T = 2019$ . Let  $E_{it}$  be the expected number of cases in LGA  $i$  for year  $t$ , representing the number of cases that expected if the population of LGA  $i$  had the same OHCA risk as the overall state-wide population across the study period.  $E_{it}$  can be calculated as  $E_{it} = n_{it} \times r$ , where  $n_{it}$  is the population of LGA  $i$  in year  $t$ , and  $r$  is the rate of OHCA in the overall state-wide population, calculated as total number of cases across the years divided by population as follows:<sup>3</sup>

$$r = \frac{\sum_i \sum_t Y_{it}}{\sum_i \sum_t n_{it}} \quad (\text{eq. 1})$$

$Y_{it}$  is modelled following a zero-inflated Poisson distribution with mean  $E_{it}\mu_{it}$ , where  $\mu_{it}$  represents the relative risk (RR) of OHCA of LGA  $i$  in year  $t$ .<sup>3</sup> In our study, RR quantifies whether a specific LGA in a specific year has higher ( $RR > 1$ ) or lower ( $RR < 1$ ) risk of OHCA

occurrence than the overall state-wide risk. This is a point of difference between our model and those of Peluso et al.<sup>1</sup> and Auricchio et al.<sup>2</sup> In Peluso et al.<sup>1</sup> and Auricchio et al.,<sup>2</sup>  $E_{it}$  refers to the resident population of region  $i$  in year  $t$ , and  $\mu_{it}$  is OHCA incidence rates.

The zero-inflated Poisson distribution was used instead of the Poisson distribution due to the presence of zero counts in our data.<sup>3</sup> The model takes the following form:

$$Y_{it} \sim \frac{\exp(\pi_0)}{1 + \exp(\pi_0)} \mathbb{1}_{Y_{it}=0} + \frac{1}{1 + \exp(\pi_0)} \text{Poisson}(E_{it}\mu_{it}) \quad (\text{eq. 2})$$

where  $\pi_0$  is the zero-inflated hyperparameter,  $E_{it}$  acts as an offset, and  $\mu_{it}$  can be expressed as follows:

$$\begin{aligned} \log(\mu_{it}) = & (\text{intercept}) + (\text{covariates}) + (\text{structured spatial} + \\ & \text{unstructured spatial}) + (\text{structured temporal} + \text{unstructured temporal}) + \\ & (\text{spatiotemporal}) \quad (\text{eq. 3}) \end{aligned}$$

The intercept,  $\mu$ , represents the overall OHCA risk in the state, common to all LGAs and years. All other variables in the model describe how OHCA risk varies between LGAs and over time. The covariates,  $X_{it}$  (and corresponding coefficients  $\beta$ ), are demographic covariates, including male/female population proportions, and sex-specific proportions of the age groups for each LGA in each year. We considered three age groups 0-14, 15-64 and 65+ years old, representing children, working-age population and senior citizens, respectively, according to the Queensland Government Statistician's Office and the Australian Bureau of Statistics.<sup>4,5</sup> The coefficient  $\beta$  is the fixed effect that covariate  $X$  has on  $\mu_{it}$ .

The spatial component consists of two random effects: structured  $u_i$  and unstructured  $v_i$ . The structured component models spatially-correlated heterogeneity in RR,  $\mu_{it}$ ; whereas the unstructured component models spatially-uncorrelated heterogeneity. Following Riebler et al.,<sup>6</sup> Simpson et al.,<sup>7</sup> and Peluso et al.,<sup>1</sup> a reparameterised version of the Besag, York and Mollie (BYM) model (called BYM2) was used for the spatial (both structured and unstructured) components of the model. The BYM2 model overcomes the limitations of the original BYM

model with regards to the marginal variance of the structured component not scaled.<sup>1,6,7</sup> By using a scaled spatially structured component and a spatially unstructured component, the BYM2 makes parameters interpretable.<sup>1,6,7</sup> It also facilitates a broad, useful framework for building priors for complex hierarchical models (called Penalised Complexity or PC priors).<sup>1,6,7</sup> Under the BYM2 model, the spatial components take the following form:

$$\frac{1}{\sqrt{\tau_s}} \left( \sqrt{\phi} u_i + \sqrt{1 - \phi} v_i \right) \quad (\text{eq. 4})$$

where  $\tau_s > 0$  is the precision parameter, accounting for the marginal variance contribution of the weighted sum of  $u_i$  and  $v_i$ . The mixing parameter  $0 \leq \phi \leq 1$  measures the proportion of spatial variability explained by the structured component. The proportion of spatial variability explained by the unstructured component is  $1 - \phi$ .

To account for possible temporal variability in the distributions of  $\mu_{it}$ , temporal effects were modelled through a temporally structured component  $\gamma_t$  (and precision parameter  $\tau_\gamma$ ) and temporally unstructured component  $\delta_t$  (and precision parameter  $\tau_\delta$ ). The temporally structured effect was modelled dynamically using a random walk of order two.

The spatiotemporal component  $\omega_{it}$  models space-time interactions, with  $\tau_\omega$  representing the precision parameter. This interaction term represents the difference between the global temporal trend and the area-specific trend.

Putting together, the RR in LGA  $i$  for year  $t$ ,  $\mu_{it}$ , can be expressed as follows:

$$\log(\mu_{it}) = \mu + \beta X_{it} + \frac{1}{\sqrt{\tau_s}} \left( \sqrt{\phi} u_i + \sqrt{1 - \phi} v_i \right) + \frac{1}{\sqrt{\tau_\gamma}} \gamma_t + \frac{1}{\sqrt{\tau_\delta}} \delta_t + \frac{1}{\sqrt{\tau_\omega}} \omega_{it} \quad (\text{eq. 5})$$

The parameters and hyperparameters to be estimated in this model are:

$$\text{Parameters: } \theta = \{\mu, \beta, u, v, \gamma, \delta, \omega\}$$

$$\text{Hyperparameters: } \psi = \{\pi_0, \phi, \tau_s, \tau_\gamma, \tau_\delta, \tau_\omega\}, \text{ with } \tau = \frac{1}{\sigma^2} \text{ defines its precision.}$$

The parameters and hyperparameters of the model can be conveniently inferred using the integrated nested Laplace approximation (INLA) method.<sup>1,8</sup> This method was proposed by Rue et al.<sup>8</sup> as a more efficient alternative to traditional Markov chain Monte Carlo algorithm for parameter inference for Bayesian hierarchical spatiotemporal models. INLA was implemented in the INLA package for the R programming language (the *R-INLA* package).

We used noninformative prior distributions on the parameters and hyperparameters. For the precision hyperparameters  $\tau_s, \tau_\gamma, \tau_\delta, \tau_\omega$ , we used PC prior with parameters  $U = 1$  and  $\alpha = 0.01$  as motivated by Riebler et al.<sup>6</sup> and Peluso et al.<sup>1</sup> For the mixing parameter  $\emptyset$ , we used PC prior with parameters  $U = 0.5$  and  $\alpha = 2/3$  according to Riebler et al.<sup>6</sup> The prior on the intercept was a uniform distribution; and the prior on the coefficients was a Gaussian distribution  $N(0, 0.001)$  as per the default specification of the INLA.<sup>9</sup> We specified a Gamma(1, 0.0005) prior on the precision of the random walk. Default specification for priors of the INLA was placed on the remaining parameters.

We also calculated the posterior probabilities of RR estimates being greater than a given threshold value. A threshold of 1.5 was used as suggested in the literature.<sup>10</sup> These probabilities are called exceedance probabilities and are useful to identify areas where there is an unusual elevation of risk. We validated the model by comparing the differences between model-estimated and observed numbers of events. All analysis was performed in R (version 3.6.1).

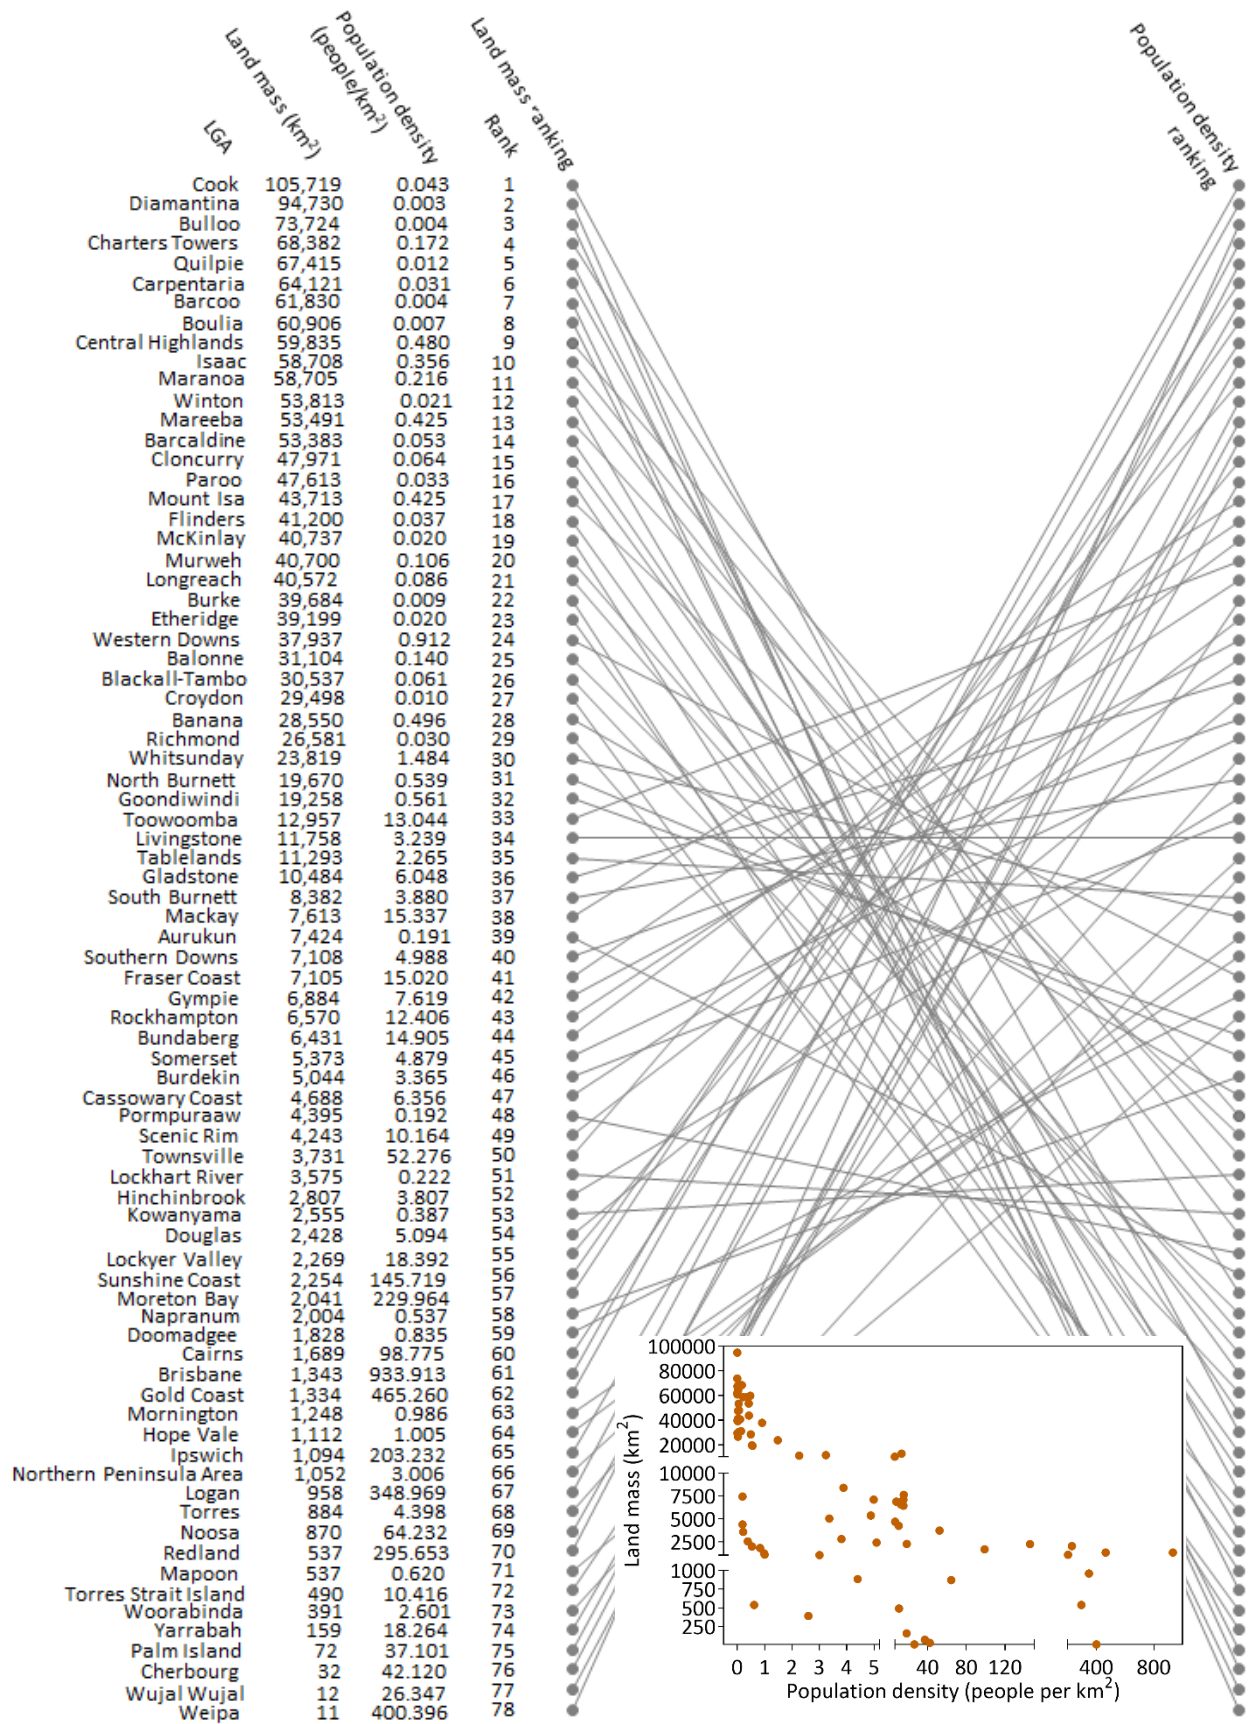

**Fig. S1** – Land mass (km<sup>2</sup>), population (people), population density (people per km<sup>2</sup>), ranking by land mass, and ranking by population density of the 78 Local Government Areas (LGA) in Queensland.

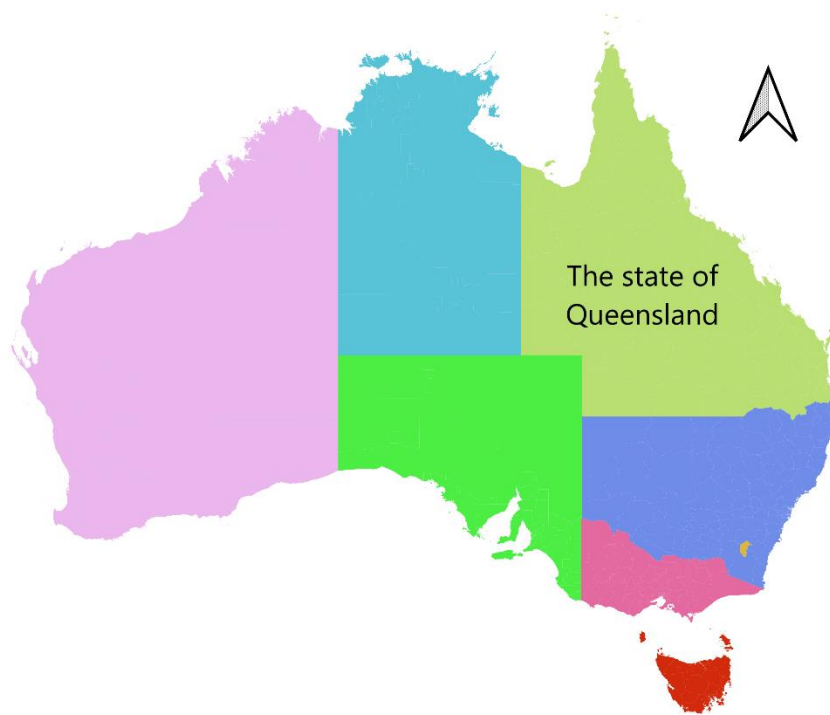

**Fig. S2** - Location of the state of Queensland in the Australia map.

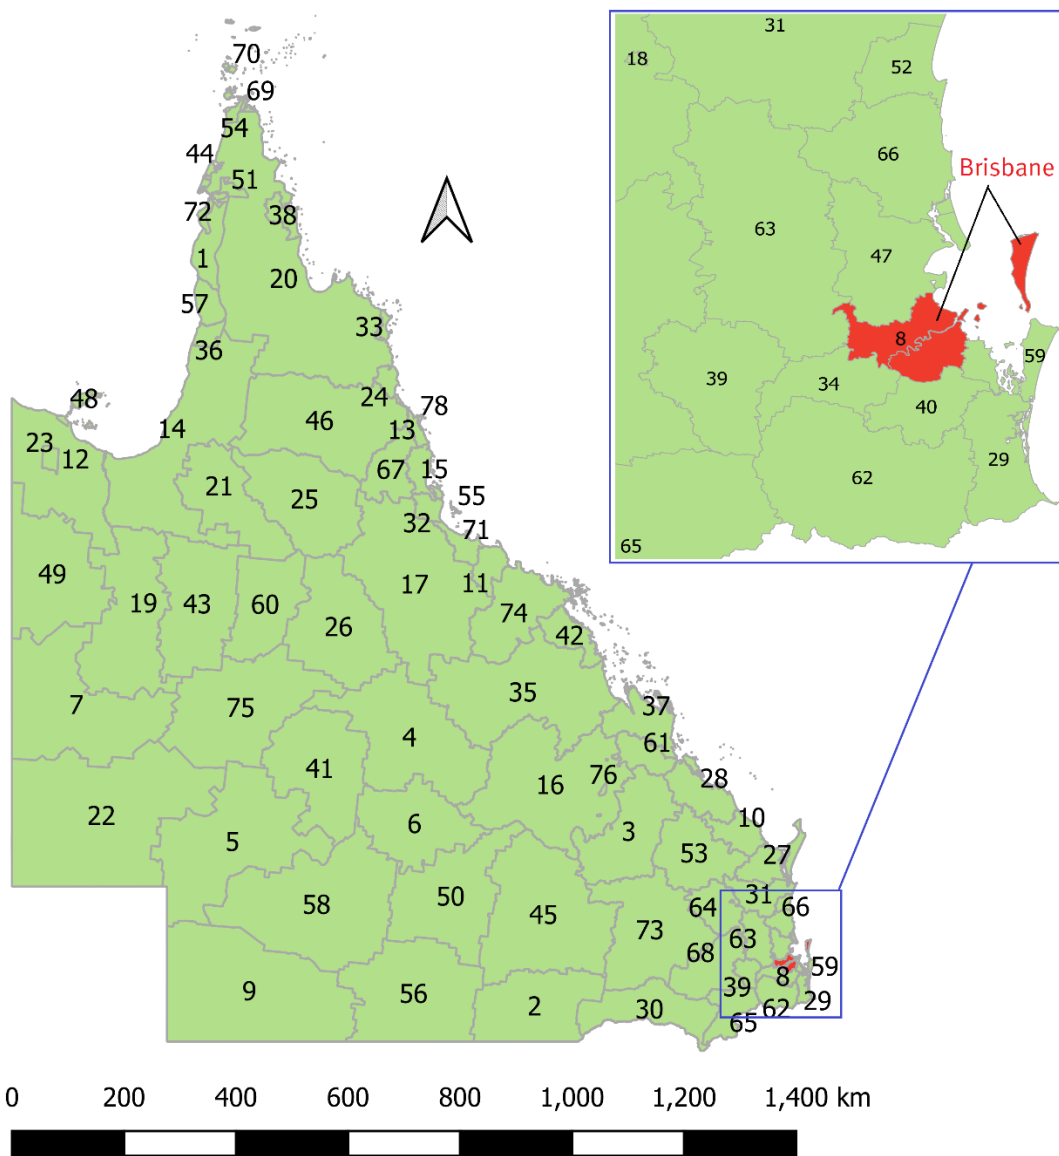

| ID | LGA               | ID | LGA            | ID | LGA                | ID | LGA                  |
|----|-------------------|----|----------------|----|--------------------|----|----------------------|
| 1  | Aurukun           | 21 | Croydon        | 41 | Longreach          | 61 | Rockhampton          |
| 2  | Balonne           | 22 | Diamantina     | 42 | Mackay             | 62 | Scenic Rim           |
| 3  | Banana            | 23 | Doomadgee      | 43 | McKinlay           | 63 | Somerset             |
| 4  | Barcaldine        | 24 | Douglas        | 44 | Mapoon             | 64 | South Burnett        |
| 5  | Barcoo            | 25 | Etheridge      | 45 | Maranoa            | 65 | Southern Downs       |
| 6  | Blackall-Tambo    | 26 | Flinders       | 46 | Mareeba            | 66 | Sunshine Coast       |
| 7  | Bouli             | 27 | Fraser Coast   | 47 | Moreton Bay        | 67 | Tablelands           |
| 8  | Brisbane          | 28 | Gladstone      | 48 | Mornington         | 68 | Toowoomba            |
| 9  | Bulloo            | 29 | Gold Coast     | 49 | Mount Isa          | 69 | Torres               |
| 10 | Bundaberg         | 30 | Goondiwindi    | 50 | Murweh             | 70 | Torres Strait Island |
| 11 | Burdekin          | 31 | Gympie         | 51 | Napranum           | 71 | Townsville           |
| 12 | Burke             | 32 | Hinchinbrook   | 52 | Noosa              | 72 | Weipa                |
| 13 | Cairns            | 33 | Hope Vale      | 53 | North Burnett      | 73 | Western Downs        |
| 14 | Carpentaria       | 34 | Ipswich        | 54 | Northern Peninsula | 74 | Whitsunday           |
| 15 | Cassowary Coast   | 35 | Isaac          | 55 | Palm Island        | 75 | Winton               |
| 16 | Central Highlands | 36 | Kowanyama      | 56 | Paroo              | 76 | Woorabinda           |
| 17 | Charters Towers   | 37 | Livingstone    | 57 | Pormpuraaw         | 77 | Wujal Wujal          |
| 18 | Cherbourg         | 38 | Lockhart River | 58 | Quilpie            | 78 | Yarrabah             |
| 19 | Cloncurry         | 39 | Lockyer Valley | 59 | Redland            |    |                      |
| 20 | Cook              | 40 | Logan          | 60 | Richmond           |    |                      |

**Fig. S3** - Names and boundaries of the 78 local government areas (LGAs) of Queensland. ID, identification number.

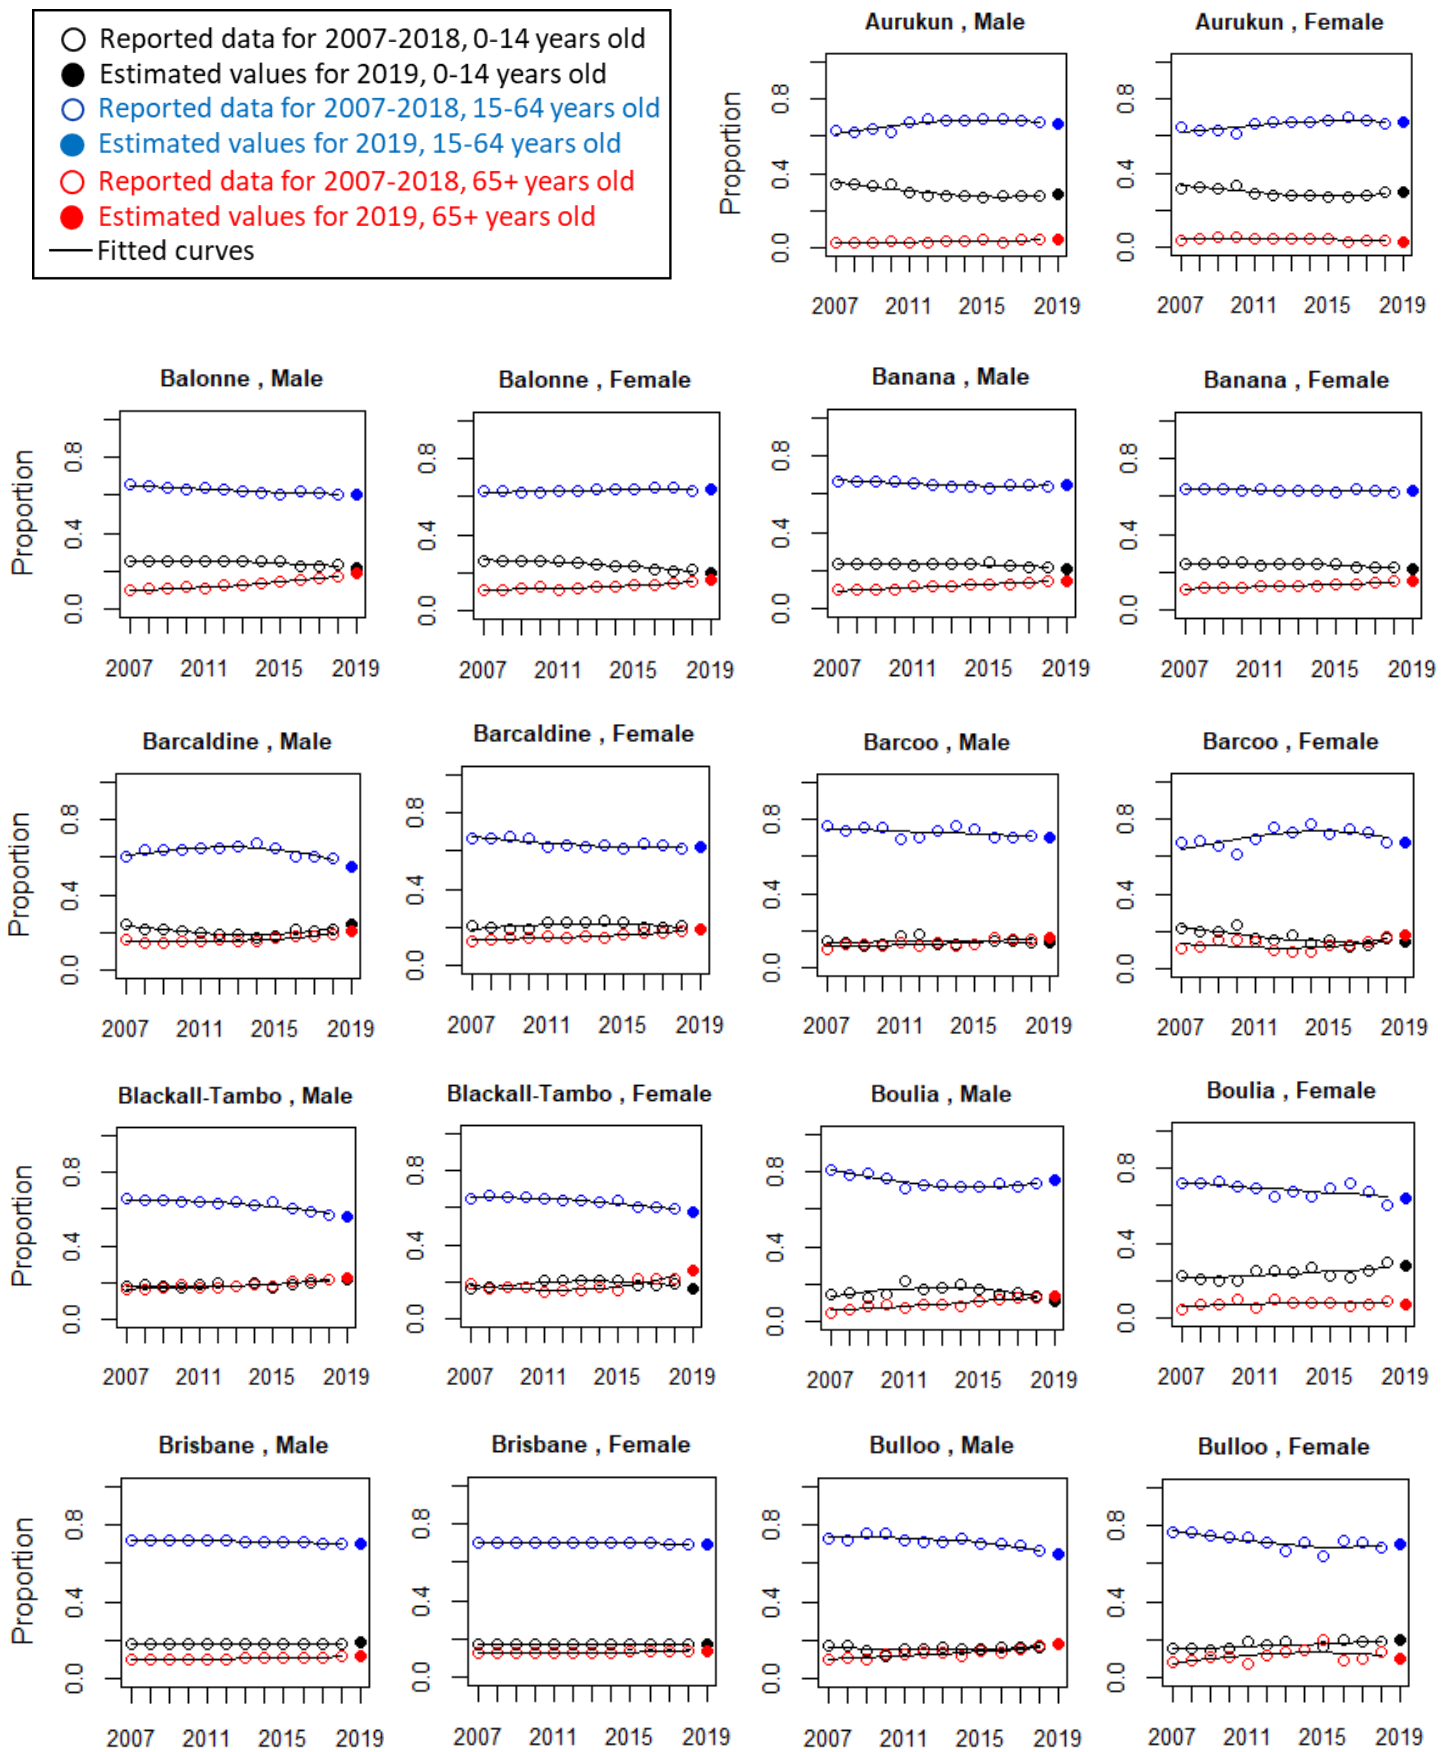

**Fig. S4** - Nonlinear least-squares (NLS) fitting to LASN-specific demographic data from 2007 to 2018, and estimated values for 2019 from the NLS models. The figure continues into the next 8 pages.



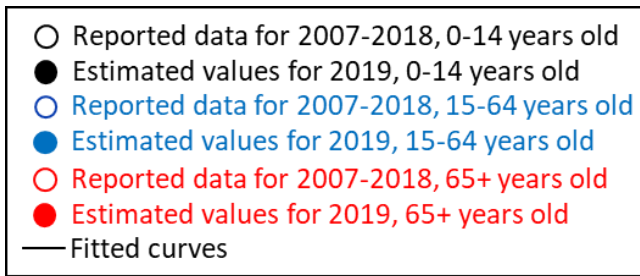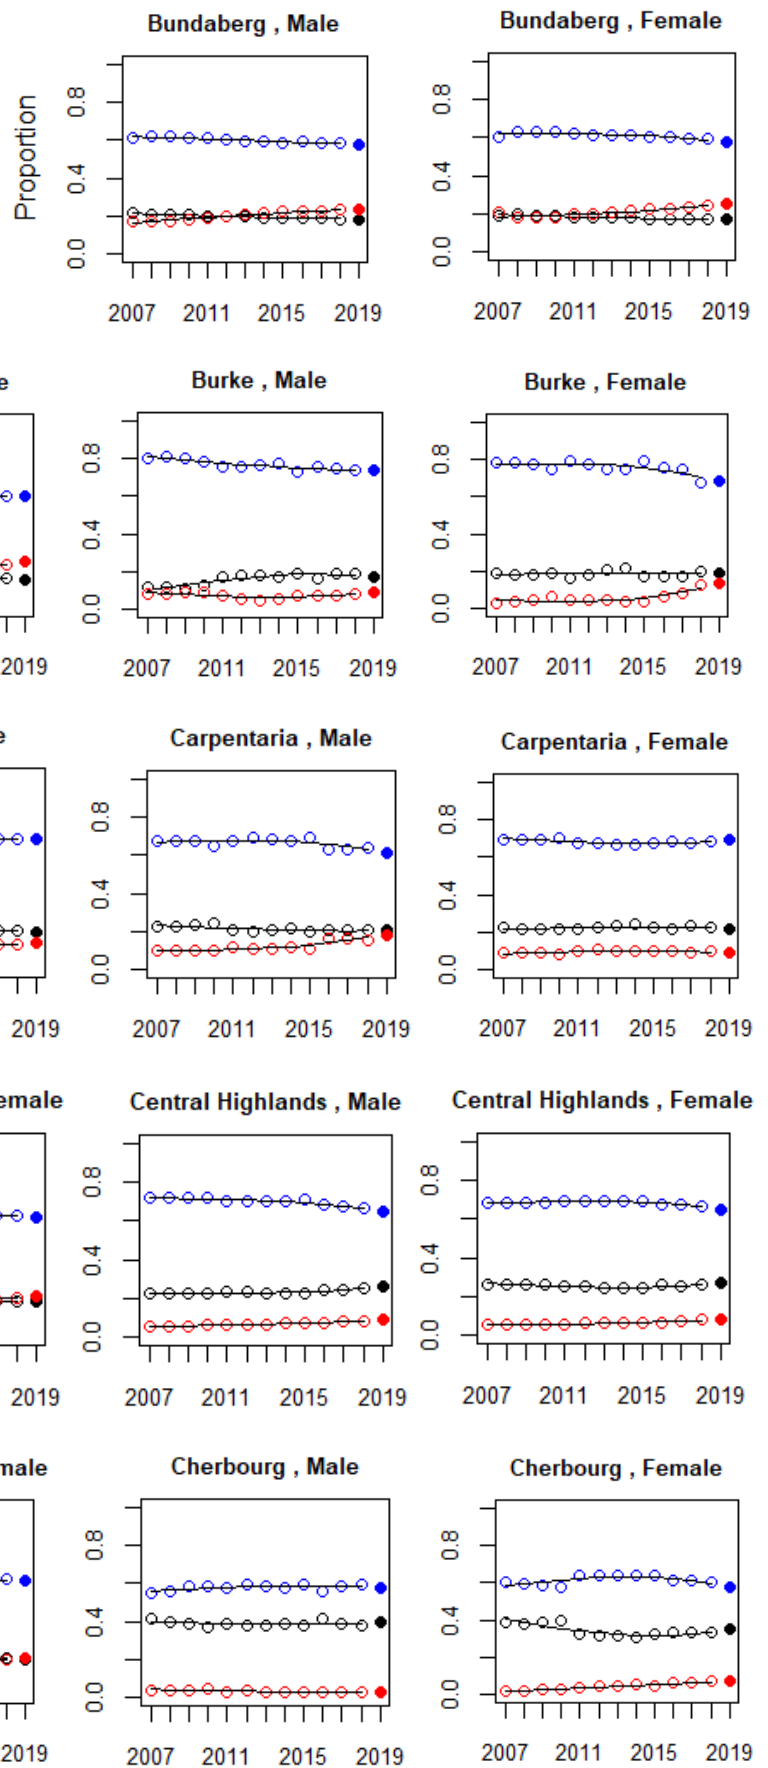

**Fig. S4 (continued)** - Nonlinear least-squares (NLS) fitting to LASN-specific demographic data from 2007 to 2018, and estimated values for 2019 from the NLS models.

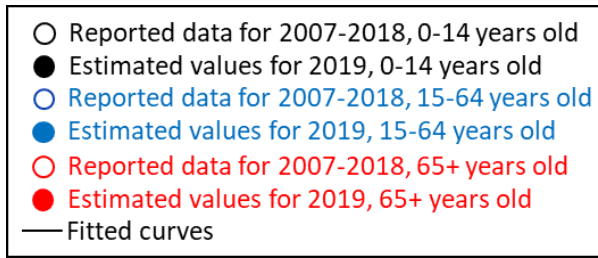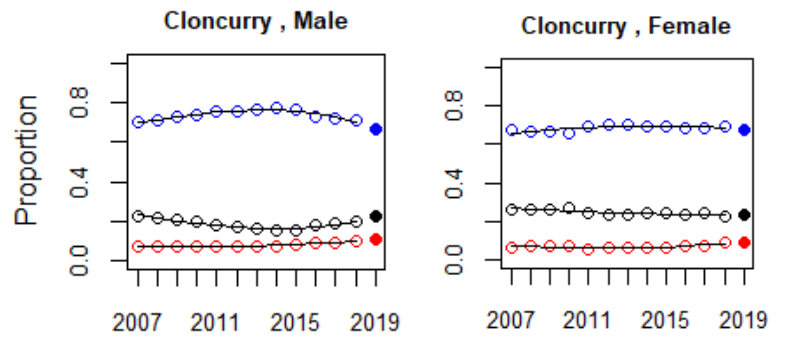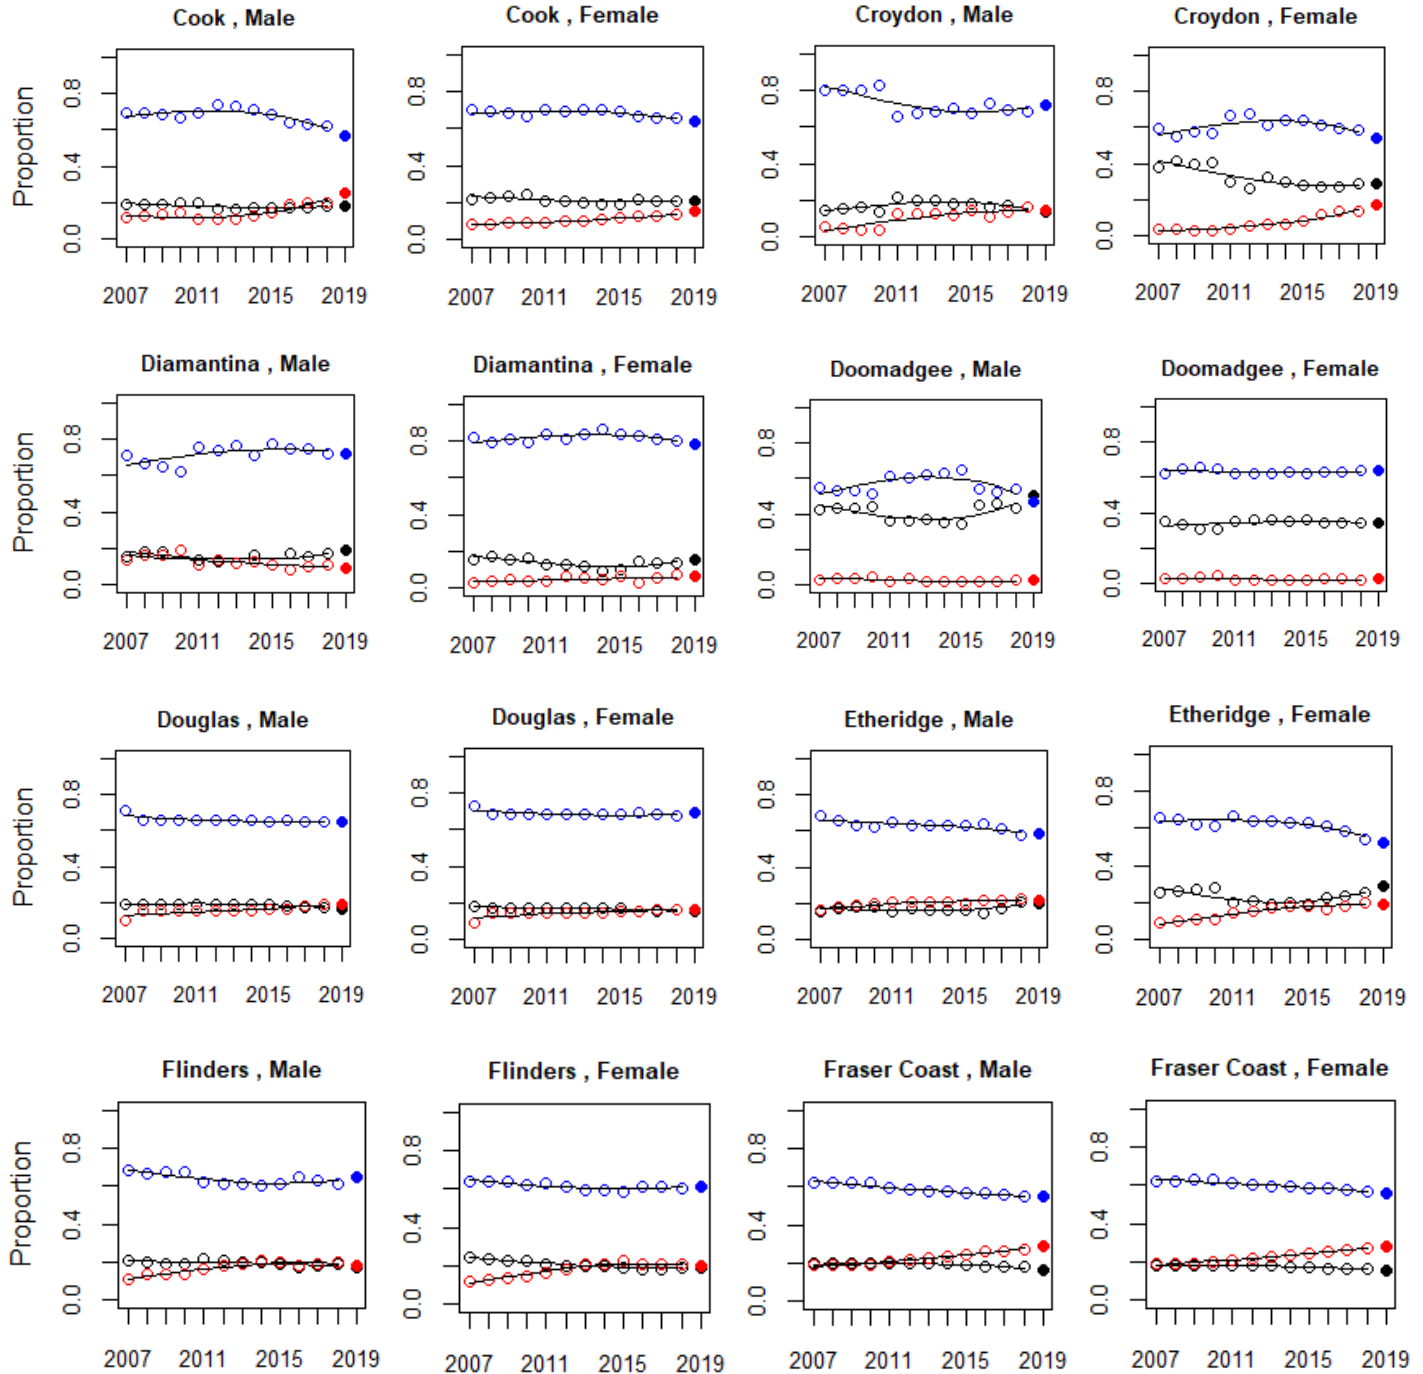

**Fig. S4 (continued)** - Nonlinear least-squares (NLS) fitting to LASN-specific demographic data from 2007 to 2018, and estimated values for 2019 from the NLS models.

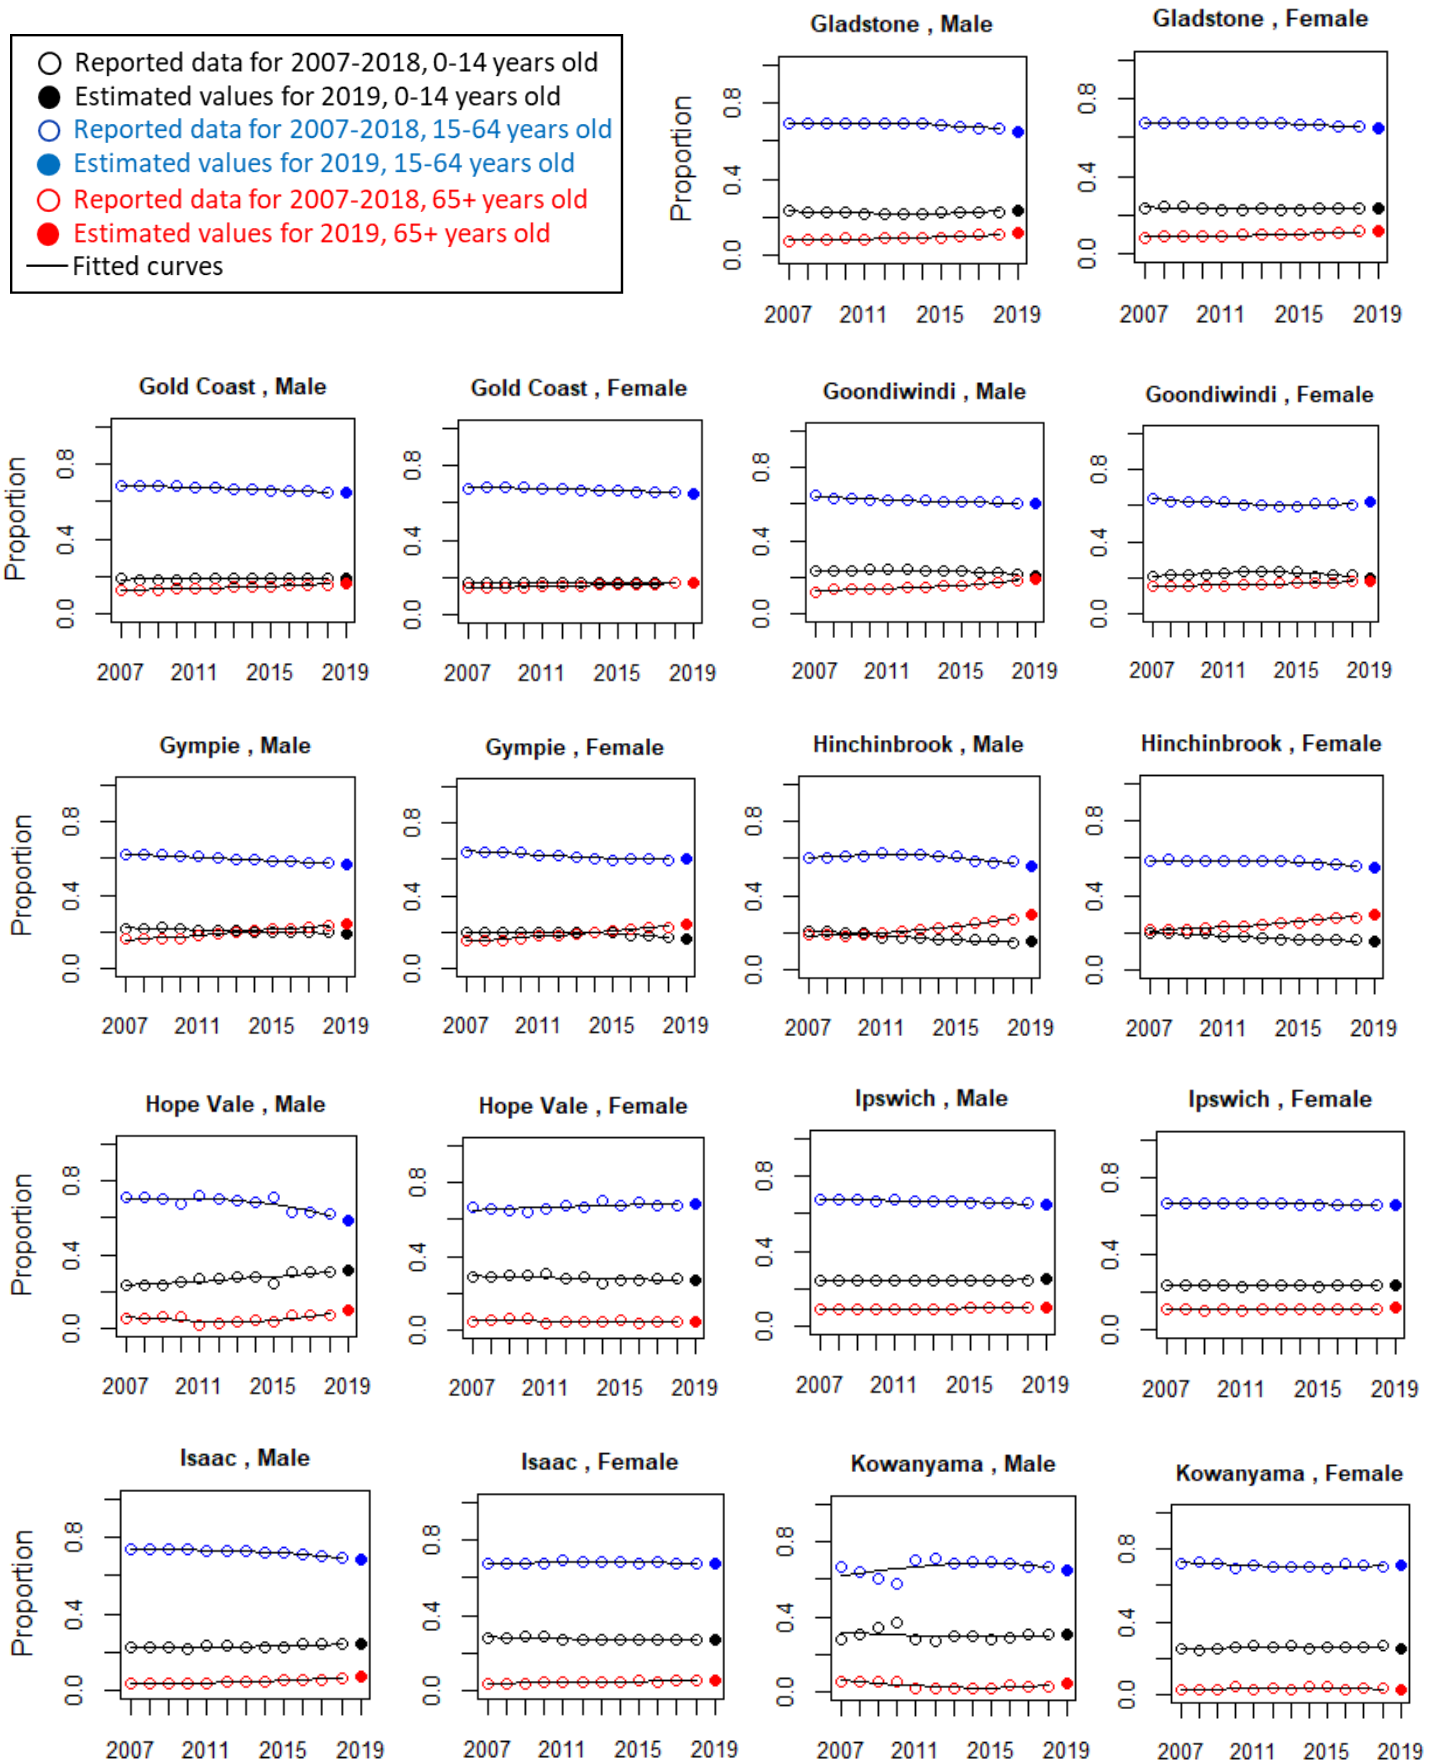

**Fig. S4 (continued)** - Nonlinear least-squares (NLS) fitting to LASN-specific demographic data from 2007 to 2018, and estimated values for 2019 from the NLS models.

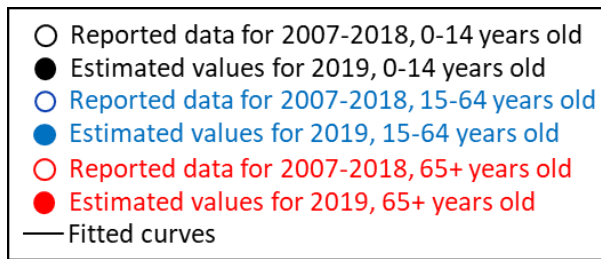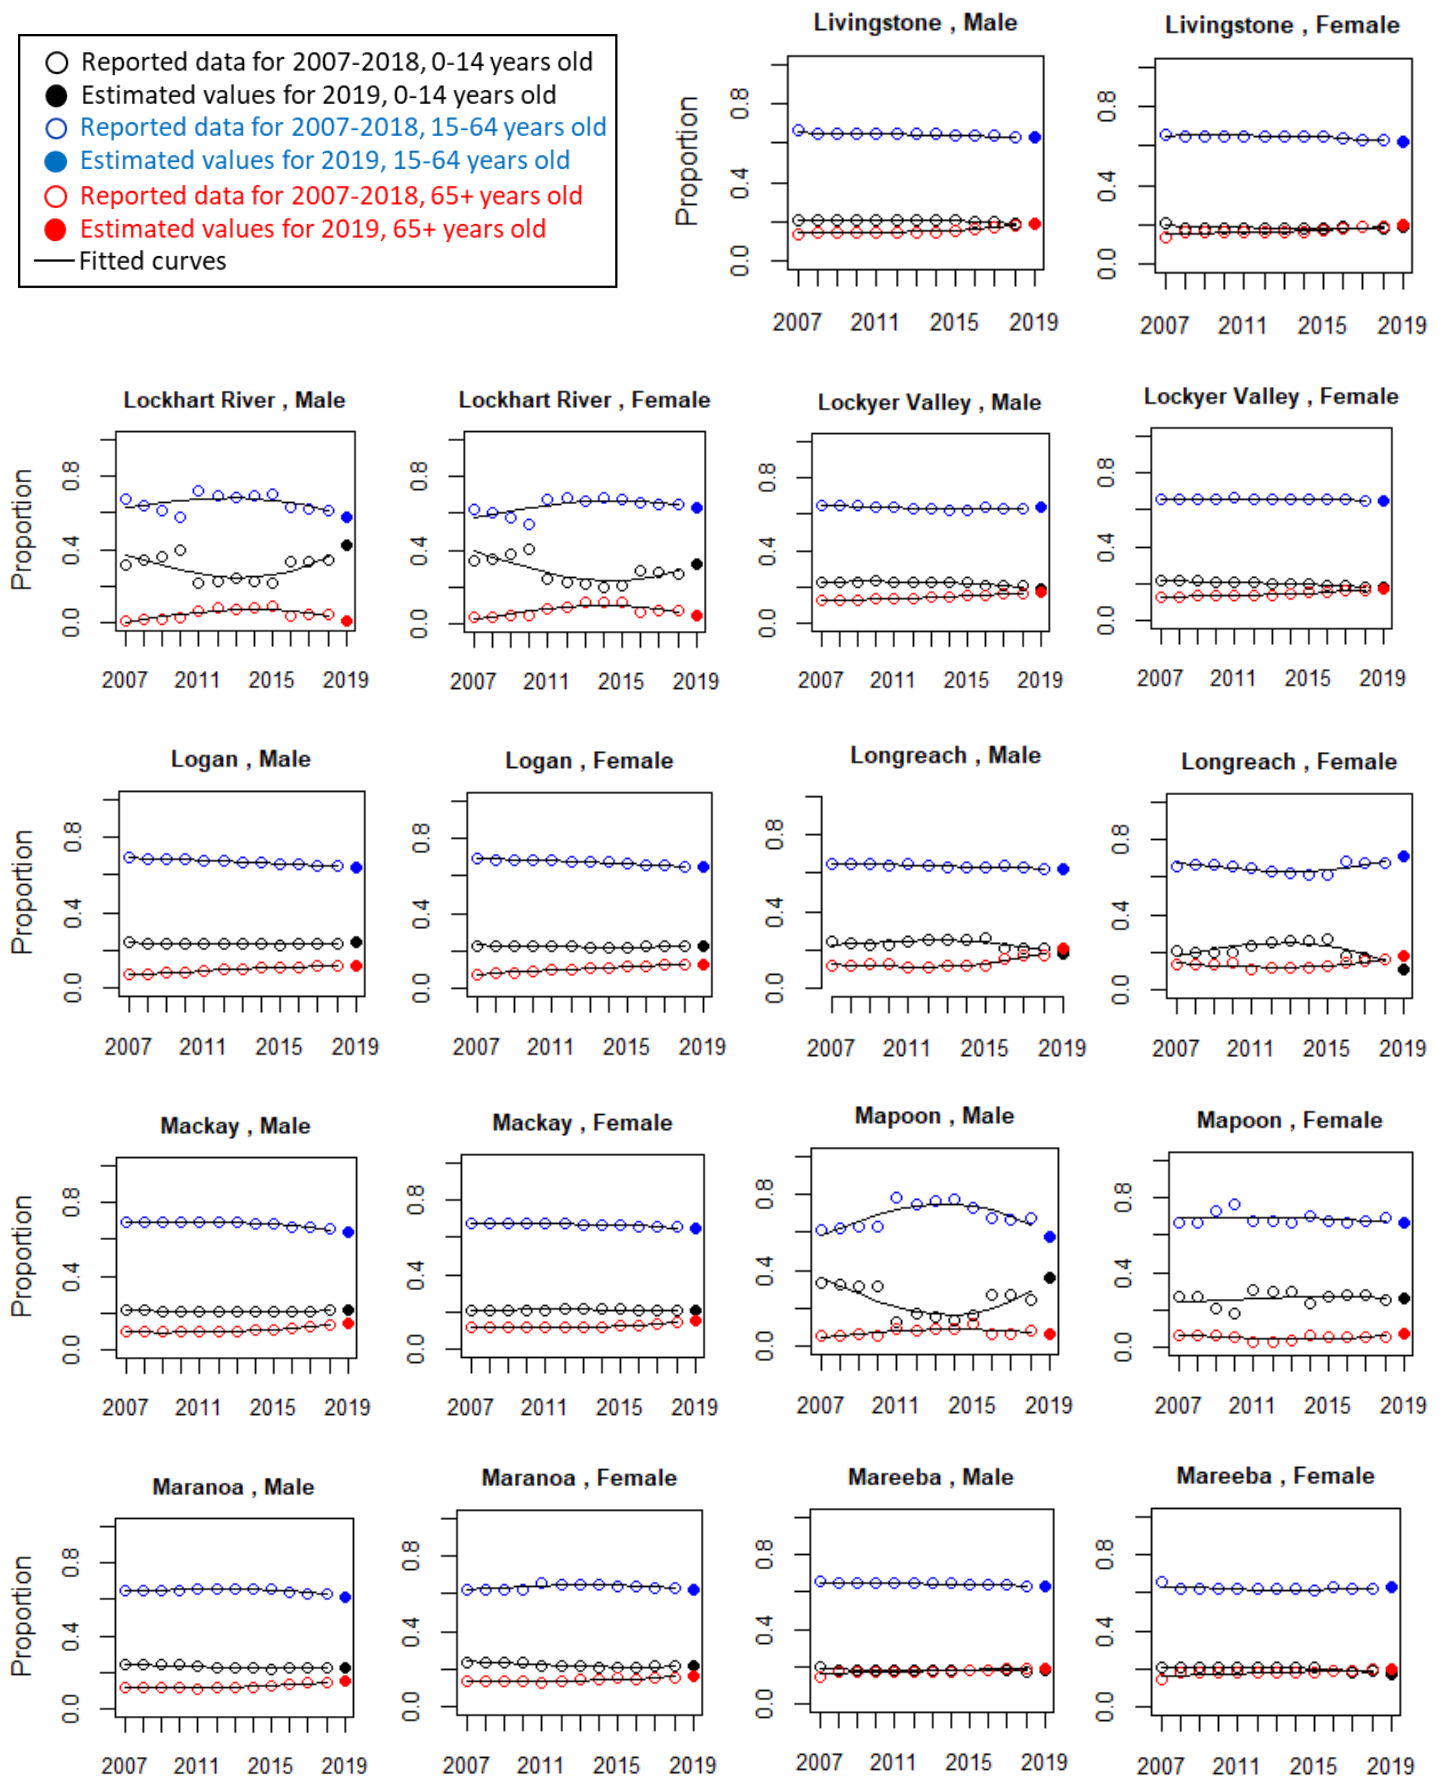

**Fig. S4 (continued)** - Nonlinear least-squares (NLS) fitting to LASN-specific demographic data from 2007 to 2018, and estimated values for 2019 from the NLS models.

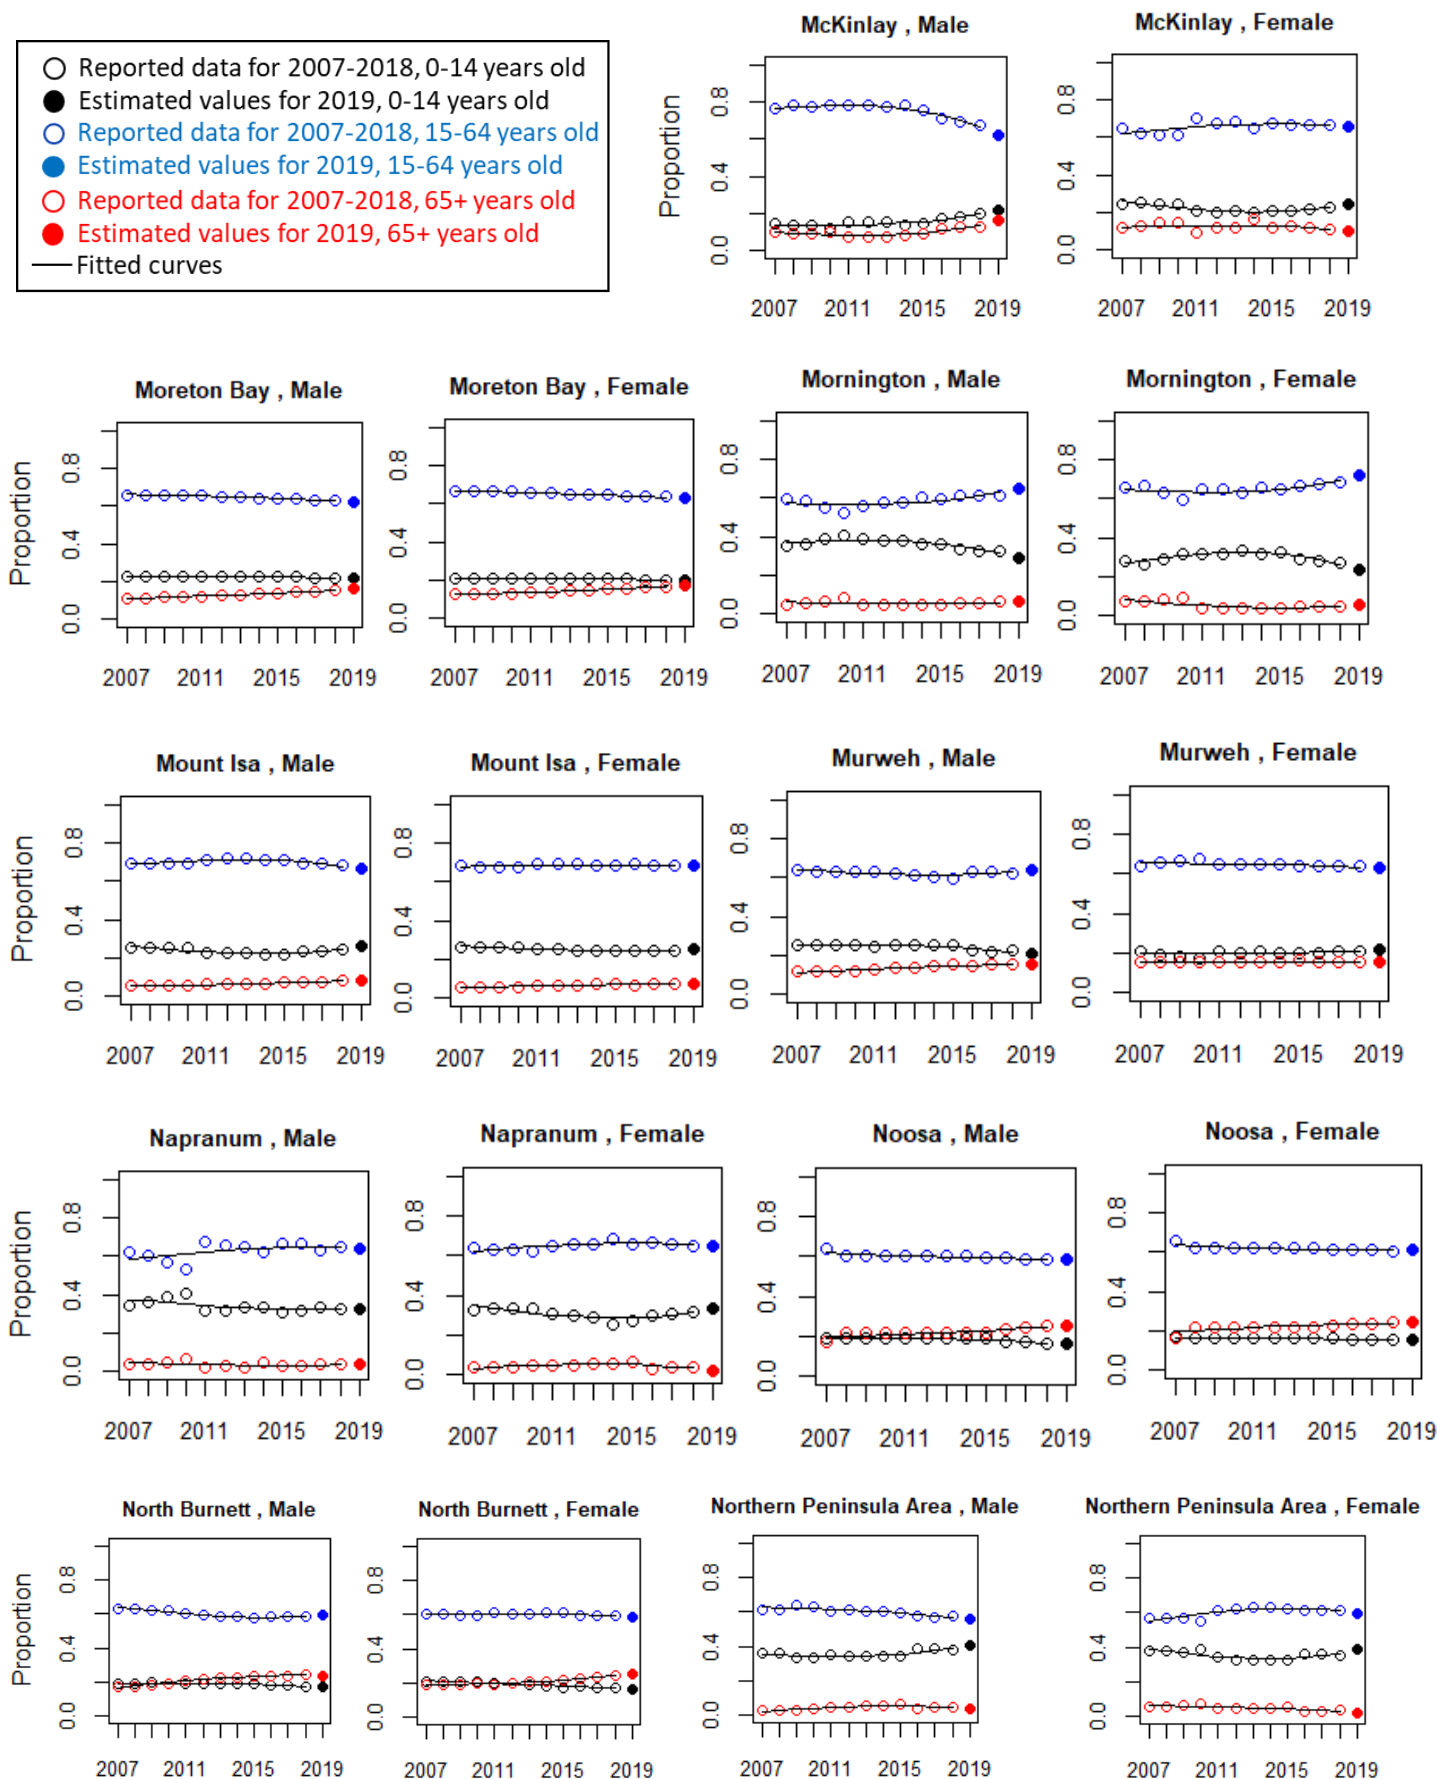

**Fig. S4 (continued)** - Nonlinear least-squares (NLS) fitting to LASN-specific demographic data from 2007 to 2018, and estimated values for 2019 from the NLS models.

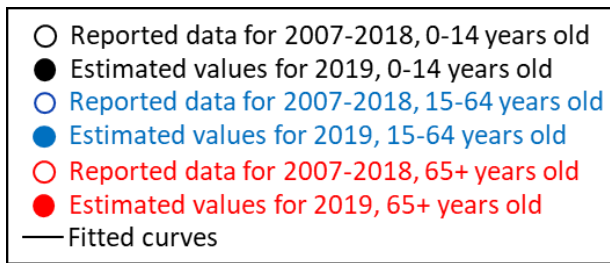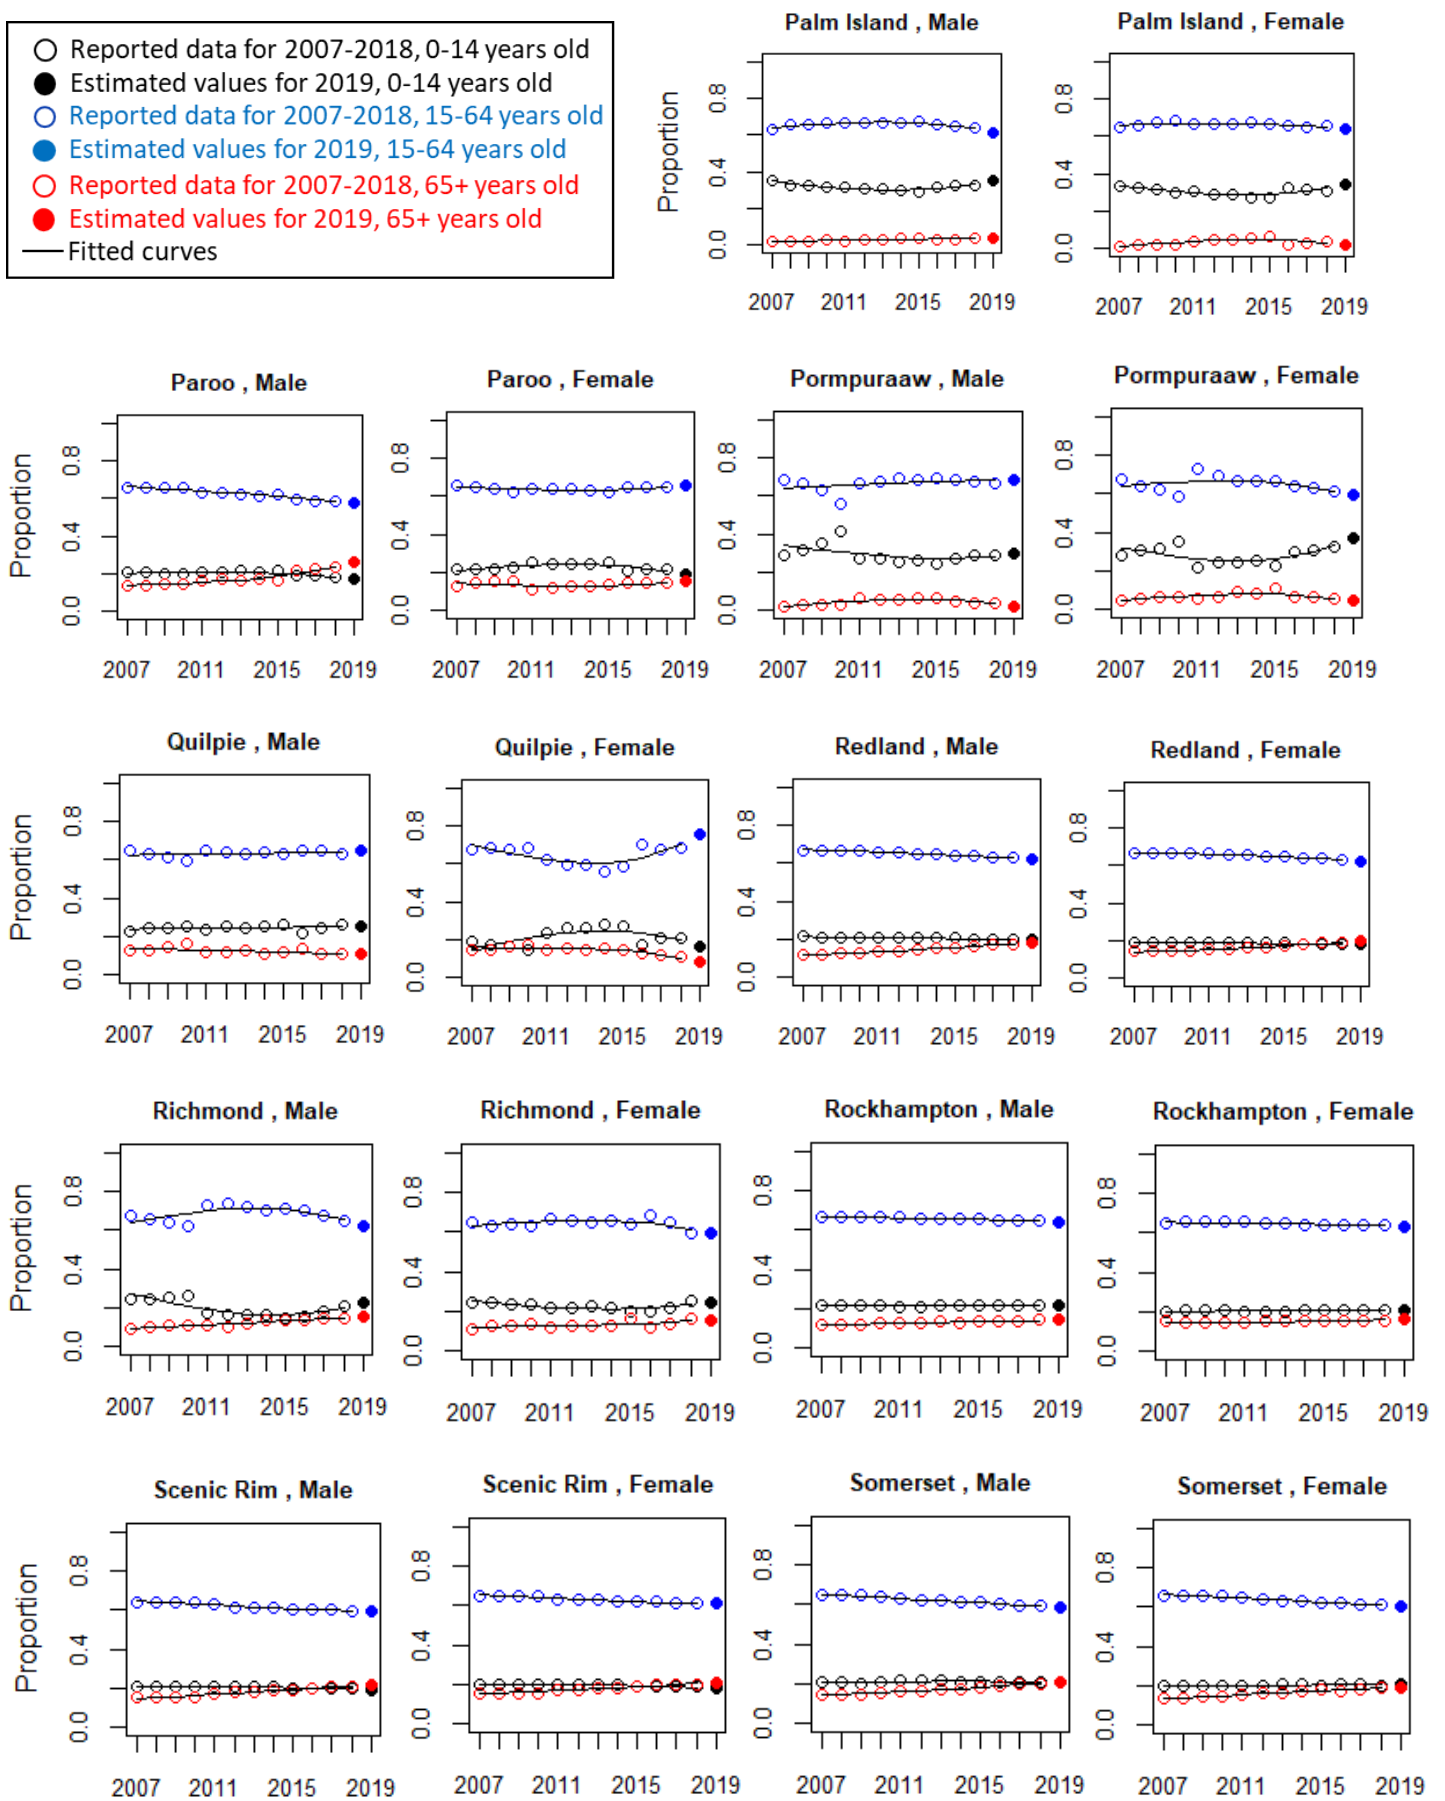

**Fig. S4 (continued)** - Nonlinear least-squares (NLS) fitting to LASN-specific demographic data from 2007 to 2018, and estimated values for 2019 from the NLS models.

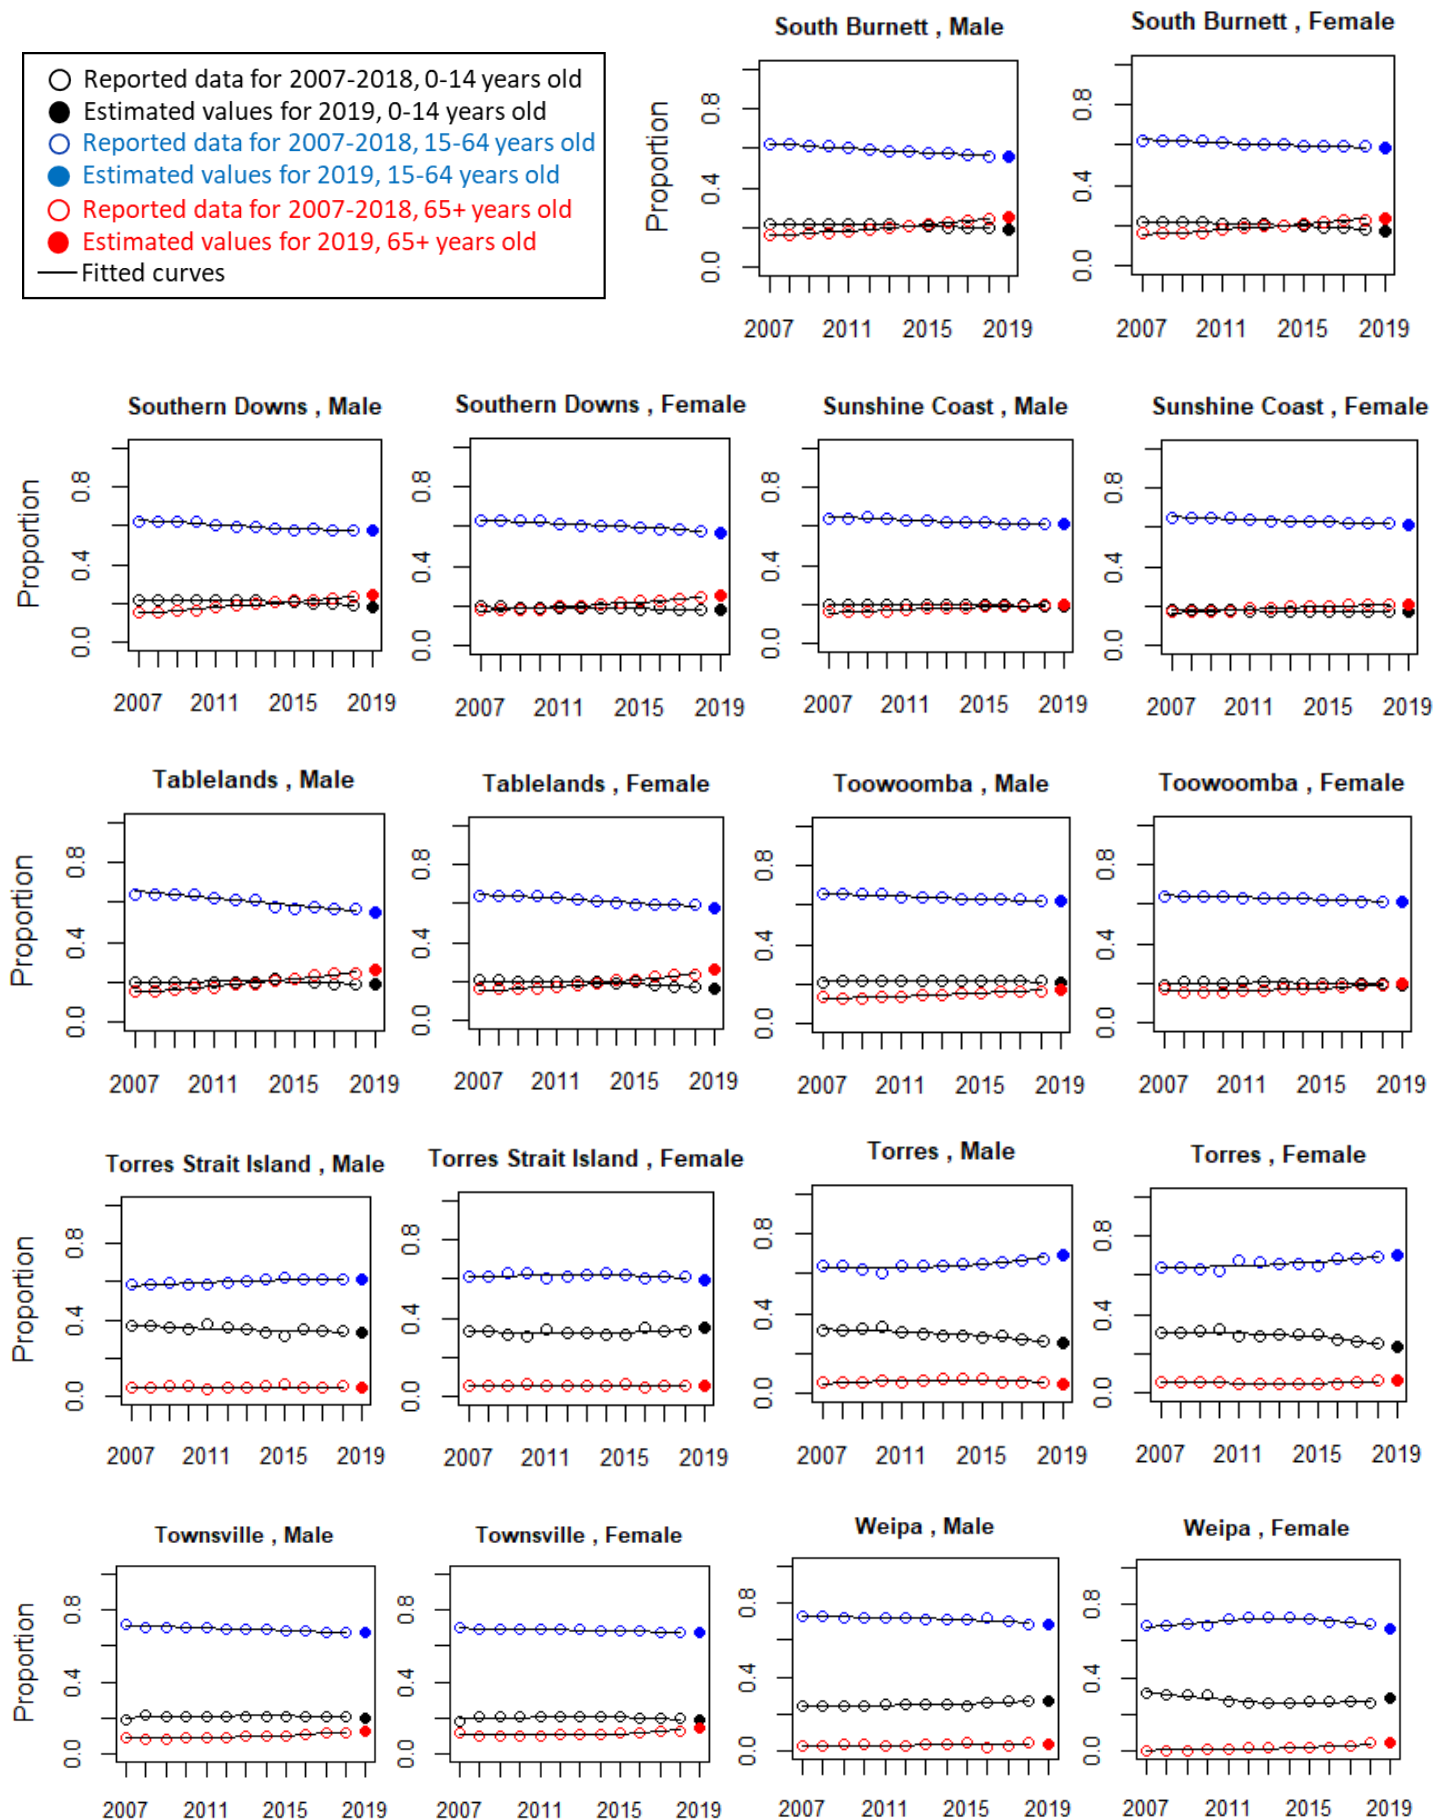

**Fig. S4 (continued)** - Nonlinear least-squares (NLS) fitting to LASN-specific demographic data from 2007 to 2018, and estimated values for 2019 from the NLS models.

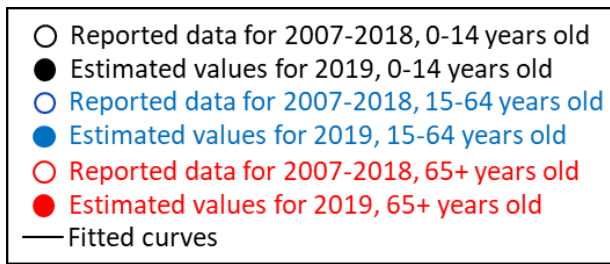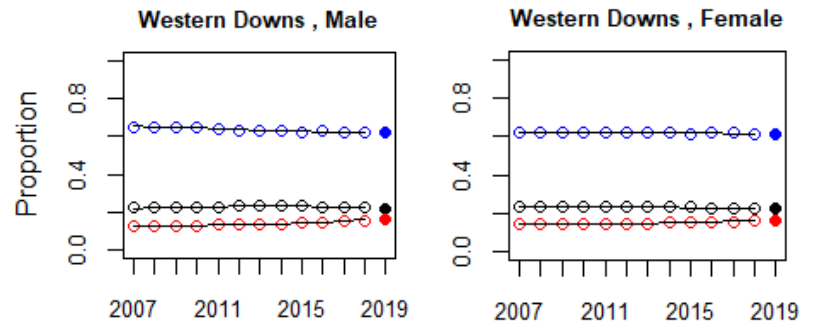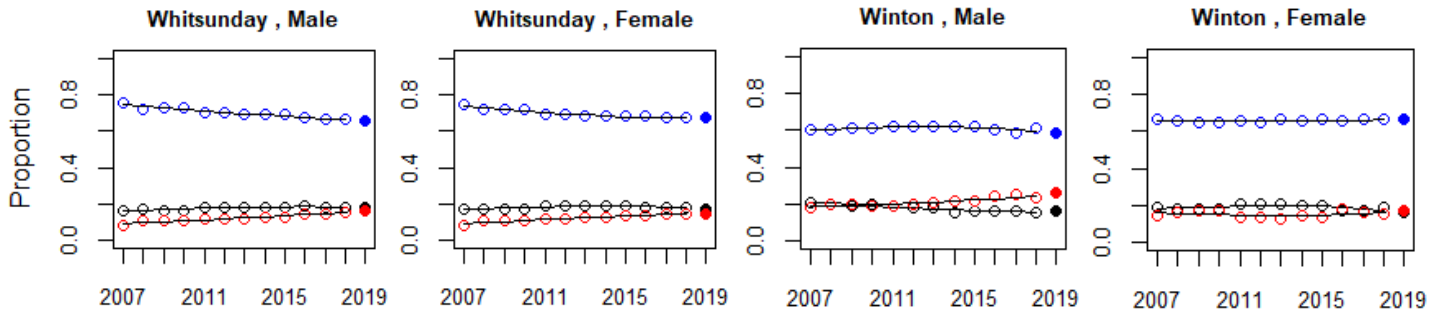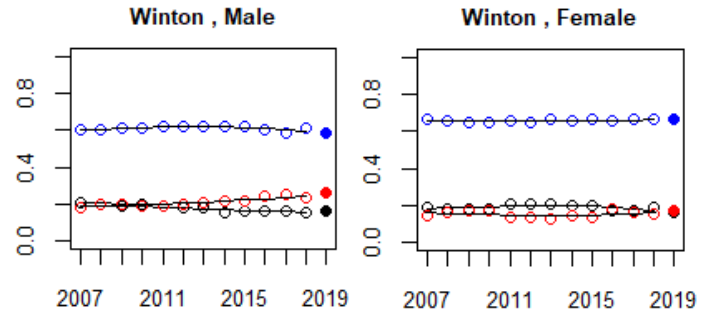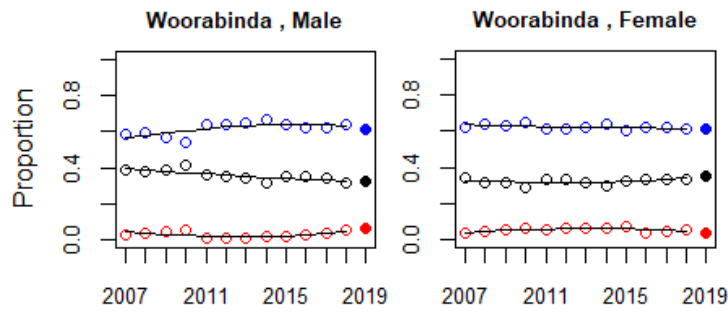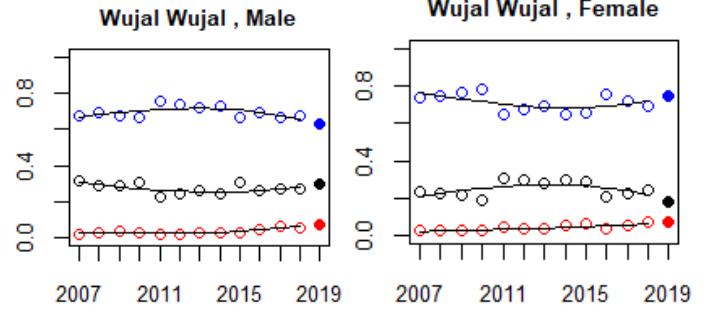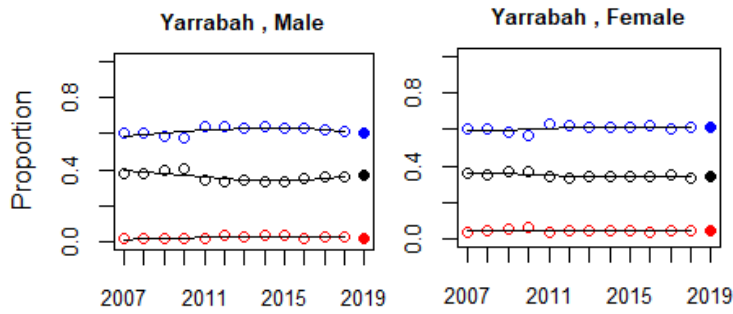

**Fig. S4 (continued)** - Nonlinear least-squares (NLS) fitting to LASN-specific demographic data from 2007 to 2018, and estimated values for 2019 from the NLS models.



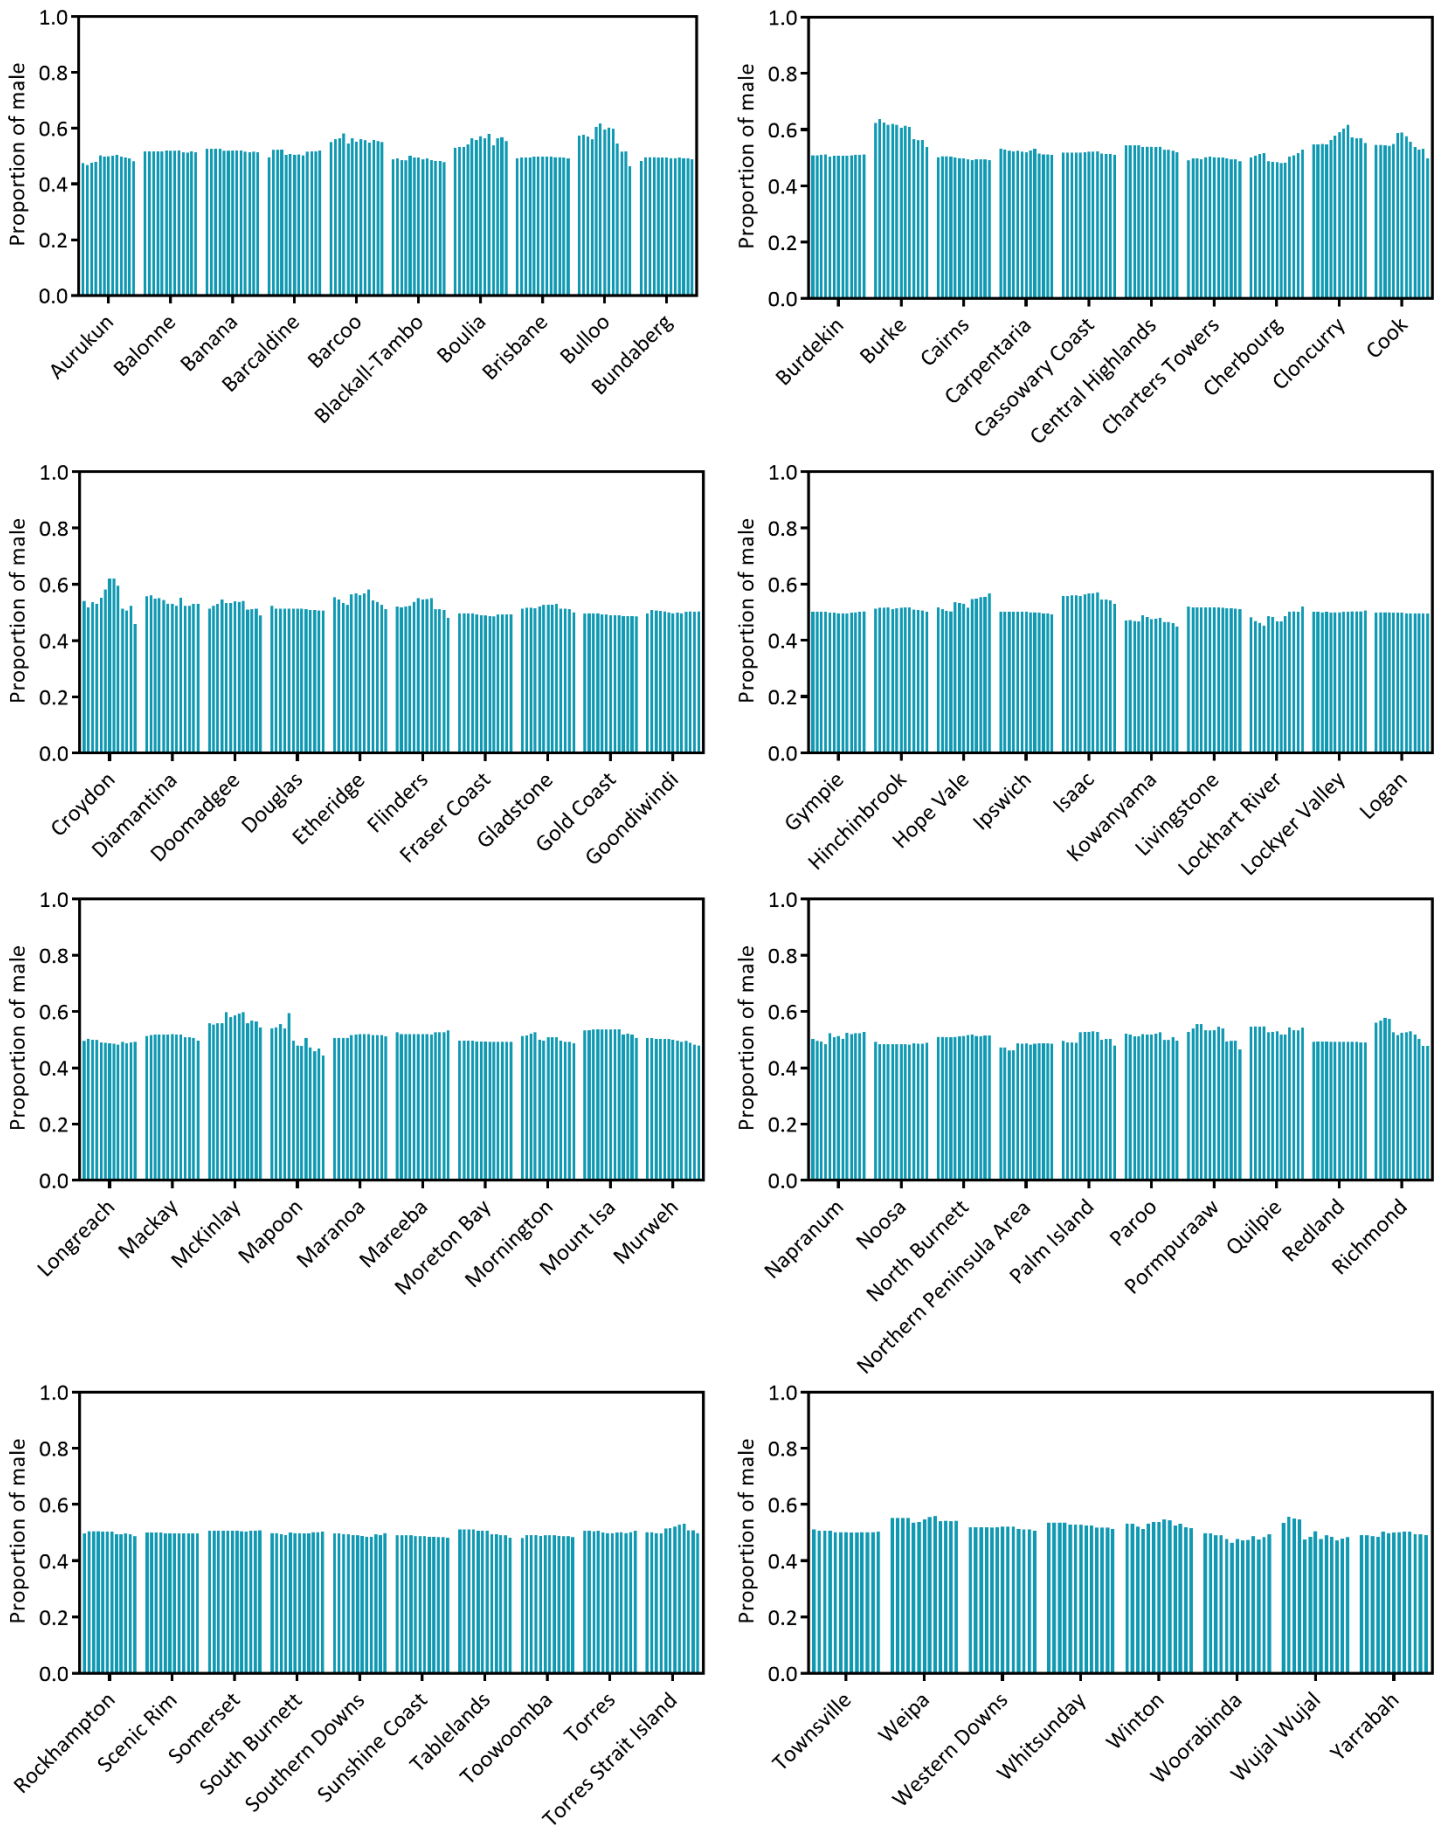

**Fig. S5** - Proportion of male population of each local government area (LGA) by year. Each panel represents a group of 10 LGAs in alphabetical order, except for the last (bottom right) panel which has 8 LGAs. For each LGA, there are 13 bars, representing years 2007 to 2019 from left to right in chronological order.

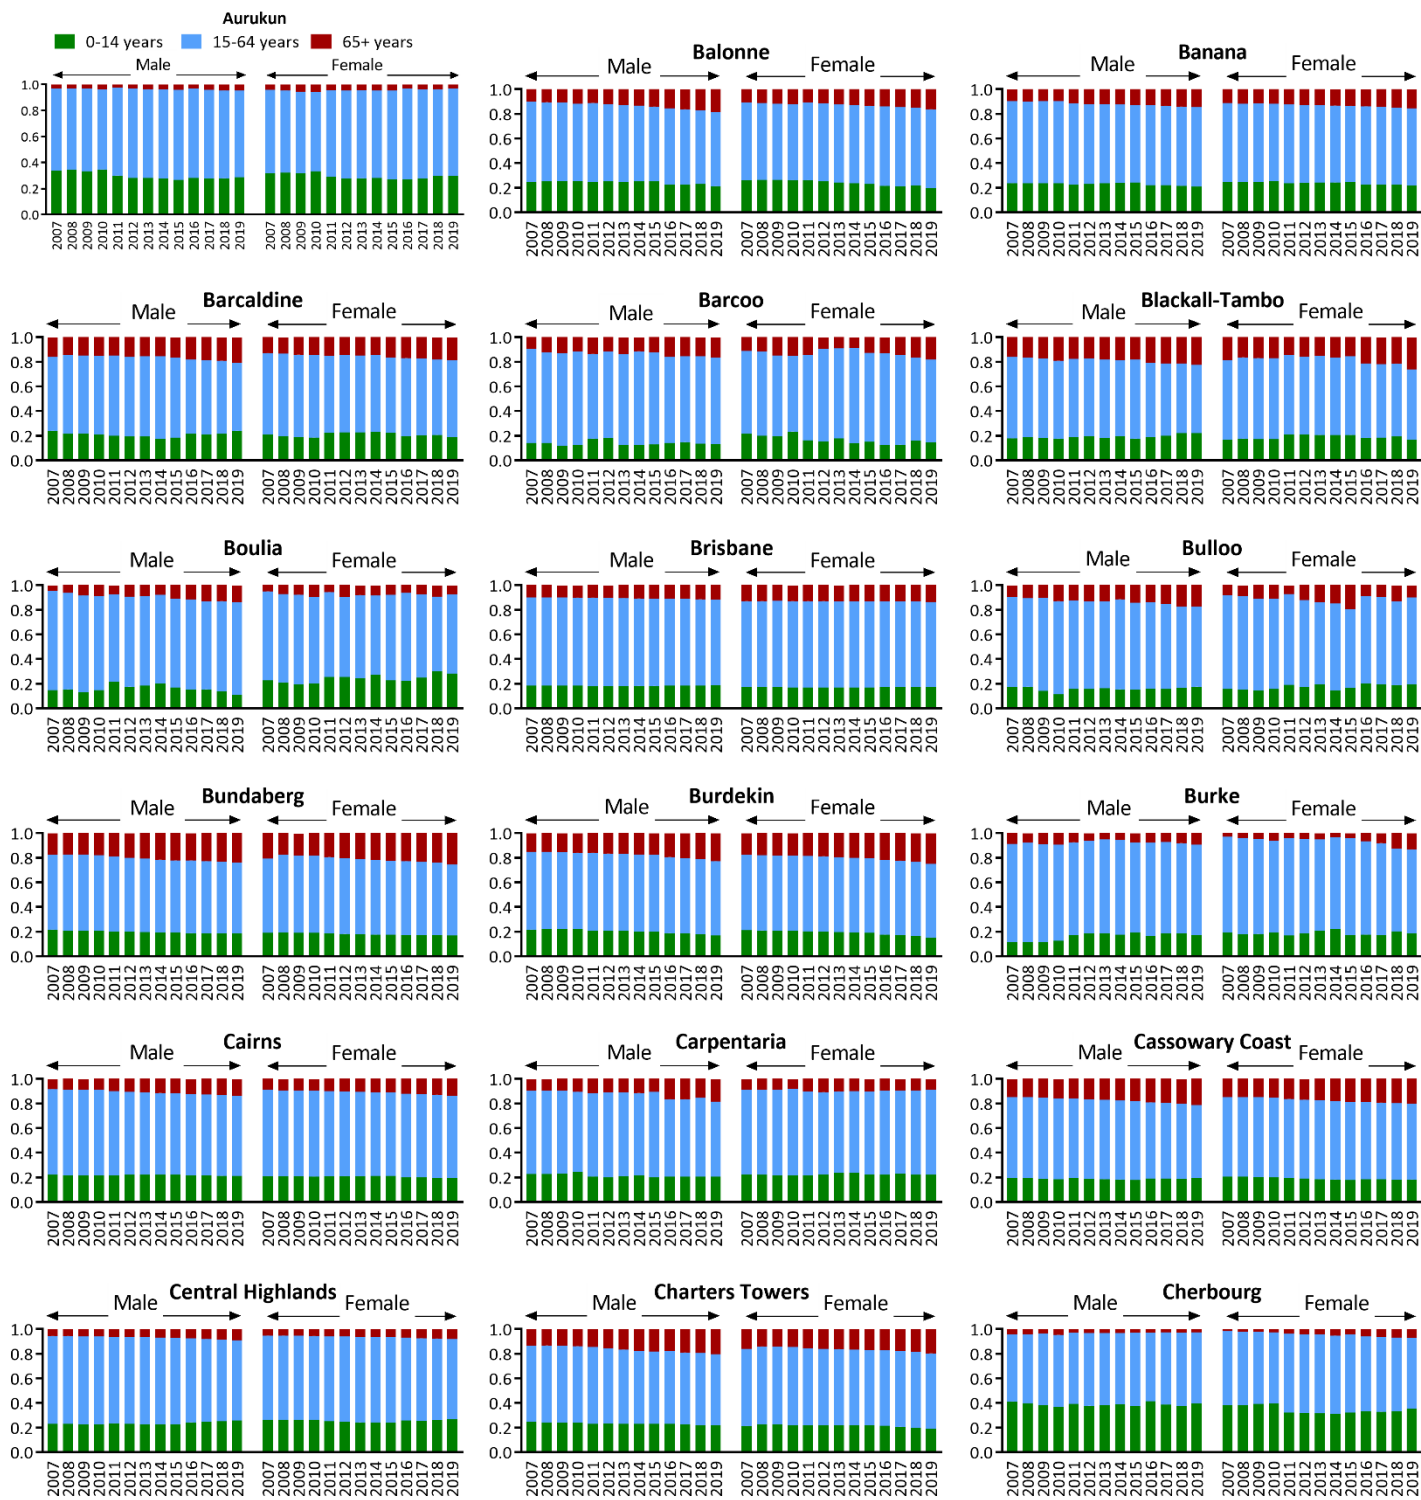

**Fig. S6 -** Age composition by sex for the 78 local government areas, presented in alphabetical order. The figure continues into the next 3 pages.

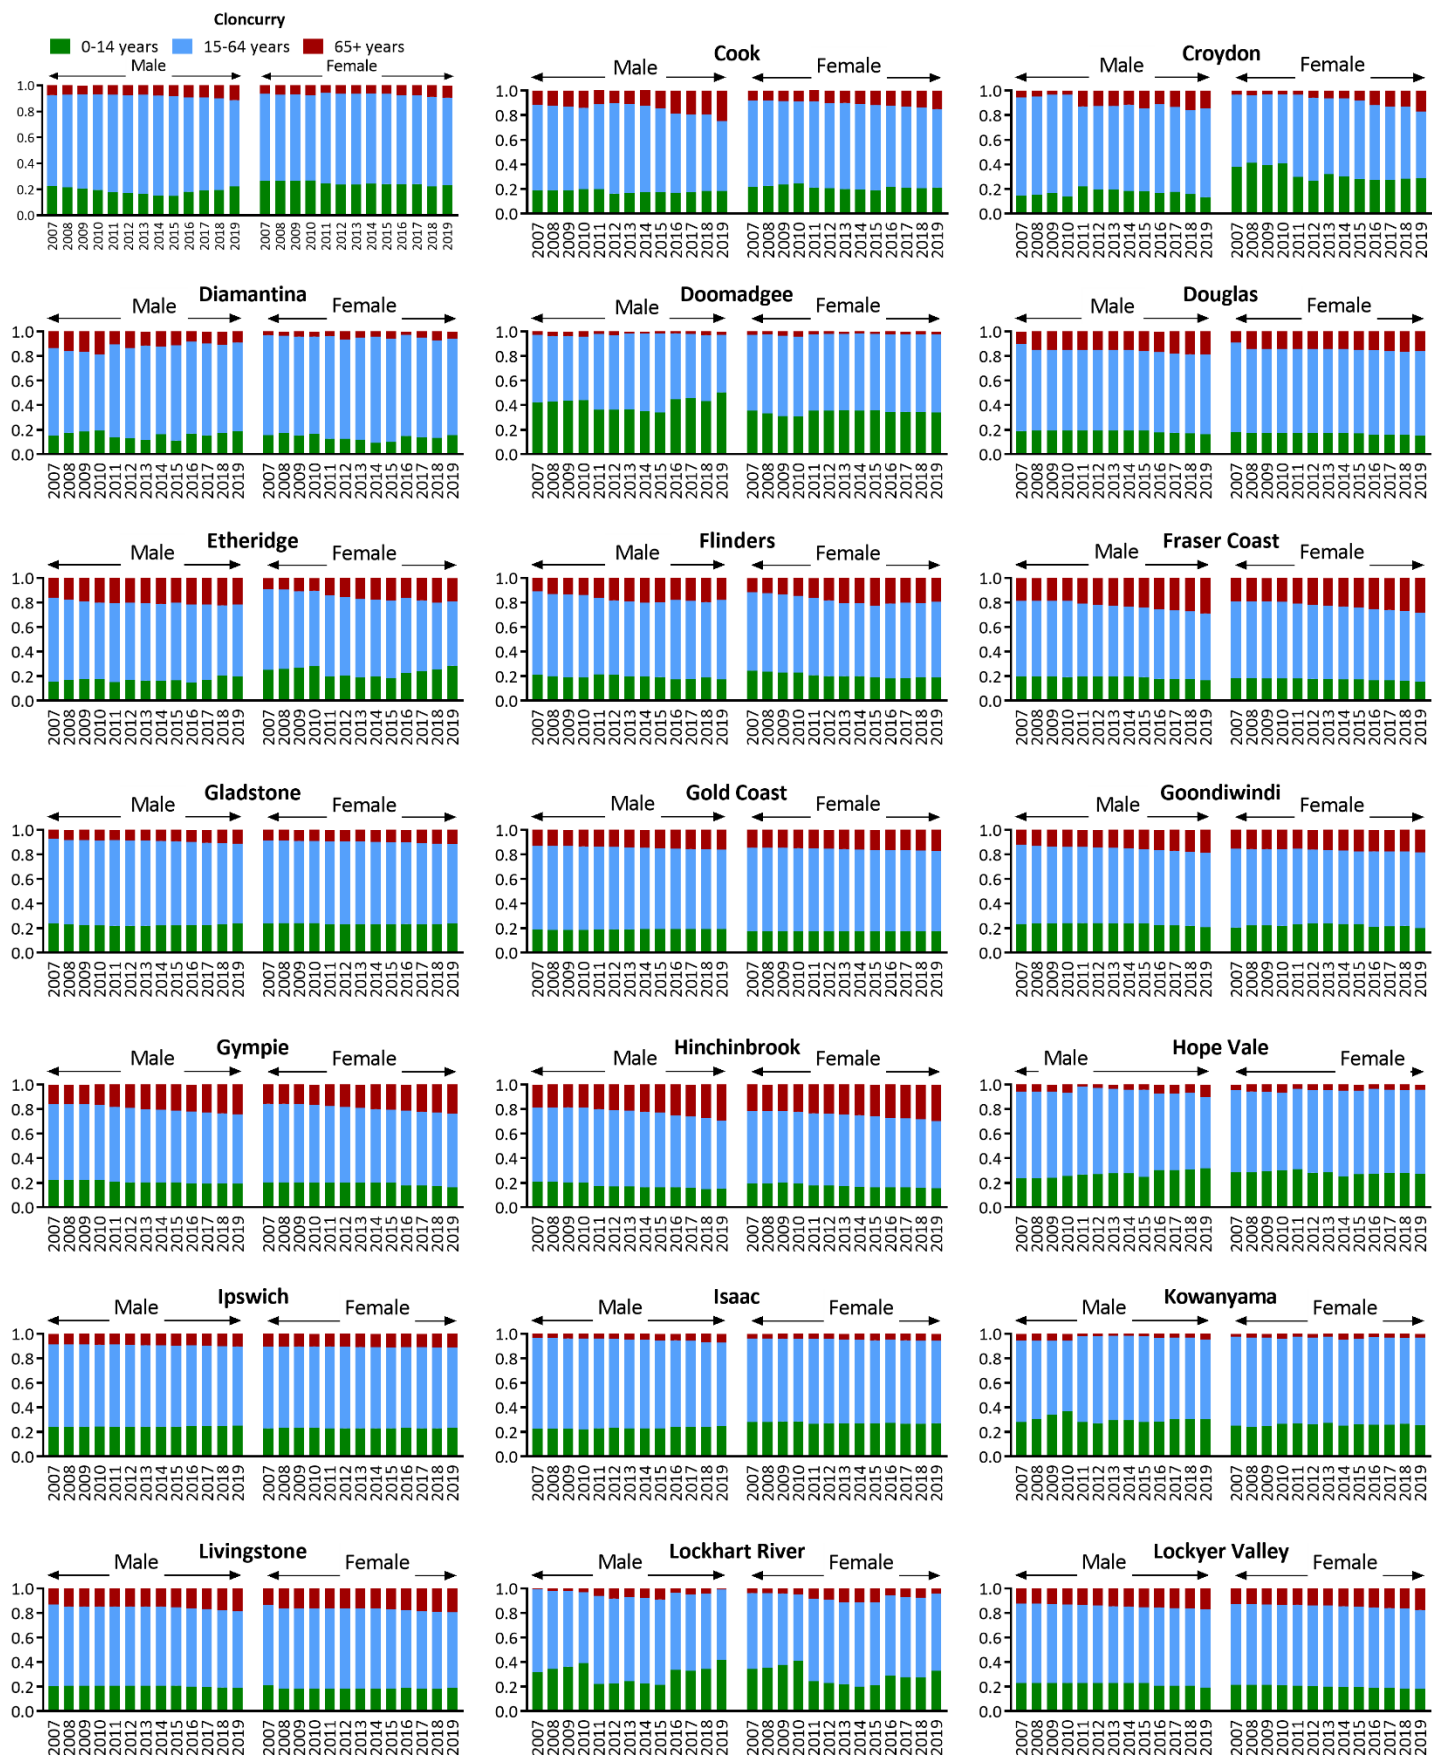

**Fig. S6 (continued)** - Age composition by sex for the 78 local government areas, presented in alphabetical order.

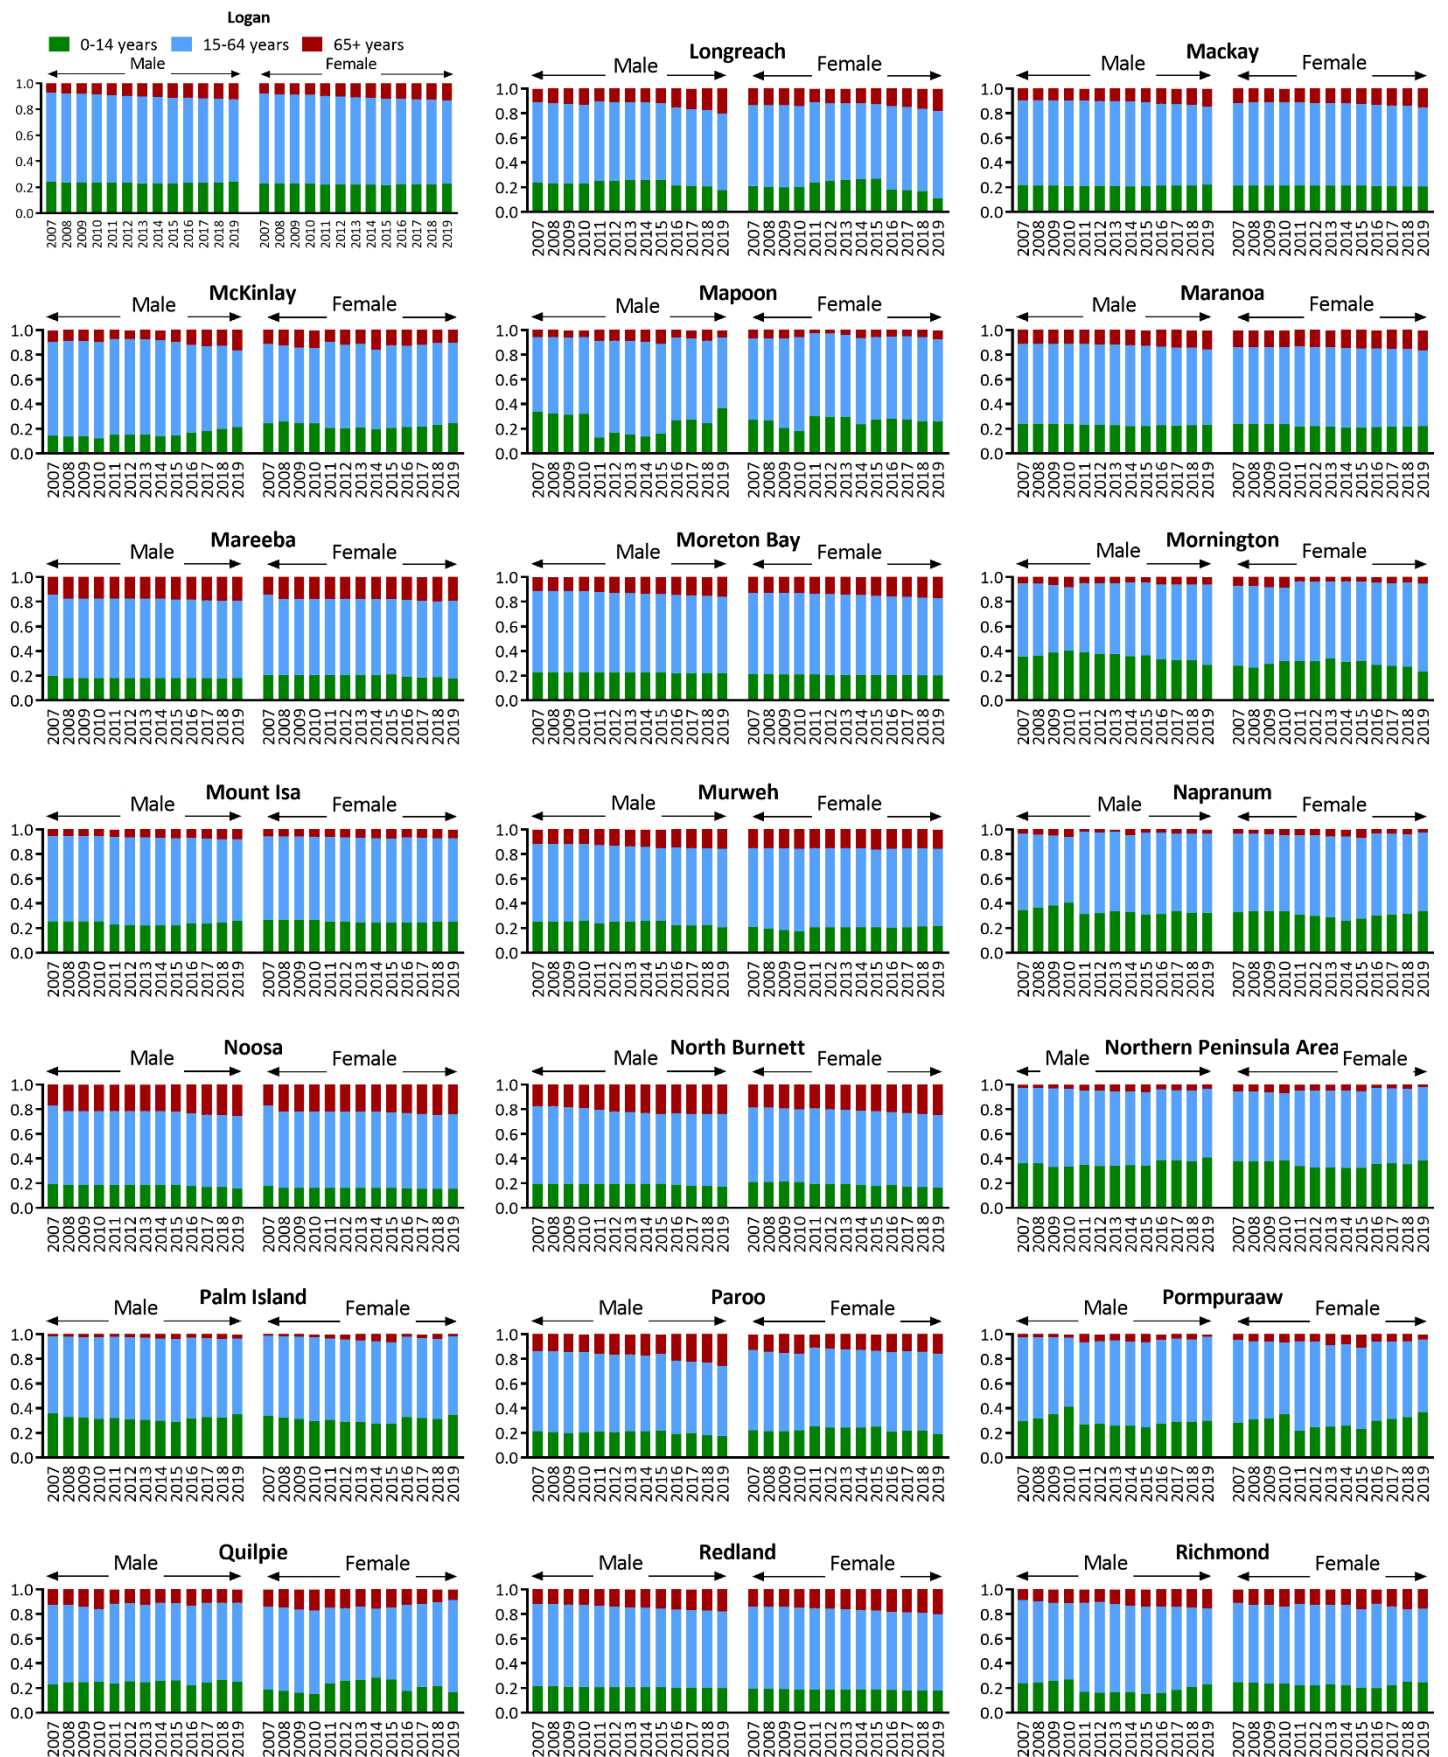

**Fig. S6 (continued)** - Age composition by sex for the 78 local government areas, presented in alphabetical order.

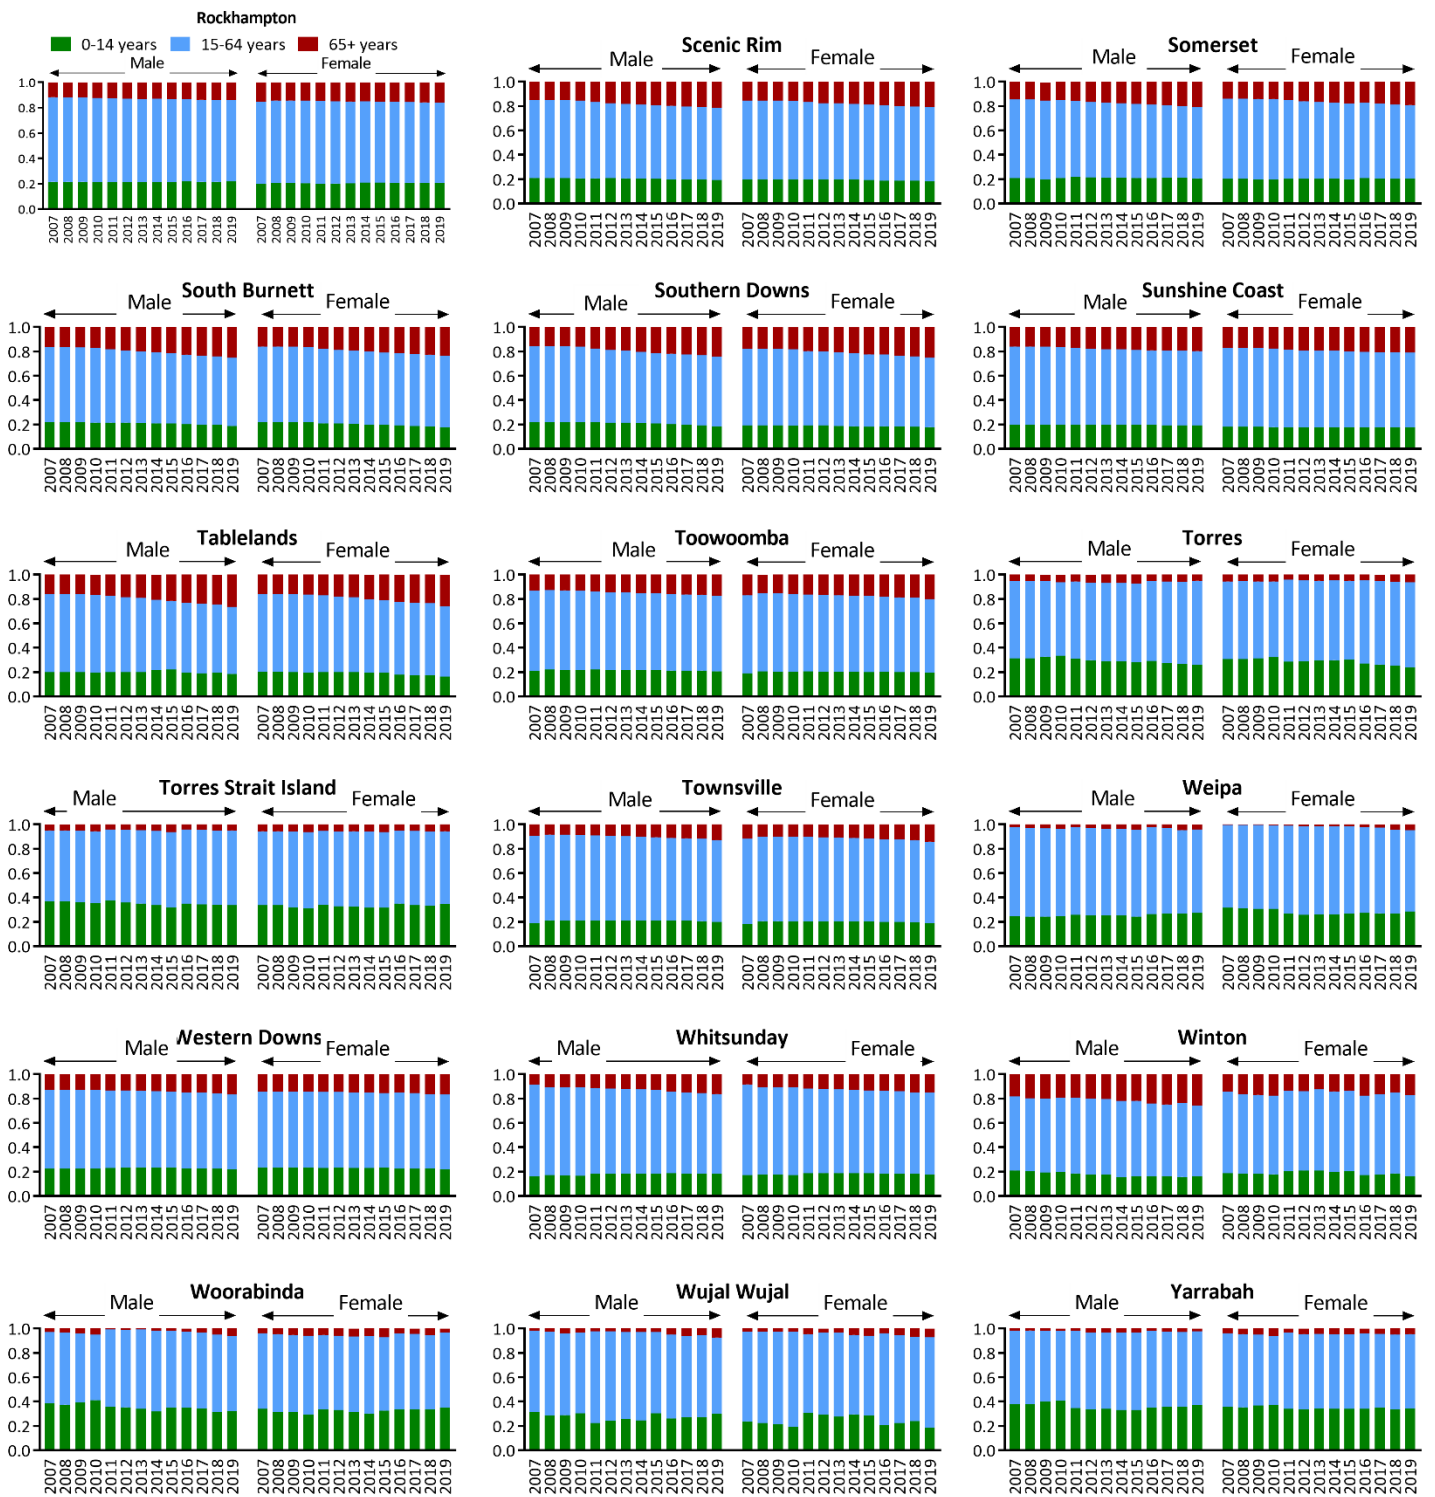

**Fig. S6 (continued)** - Age composition by sex for the 78 local government areas, presented in alphabetical order.

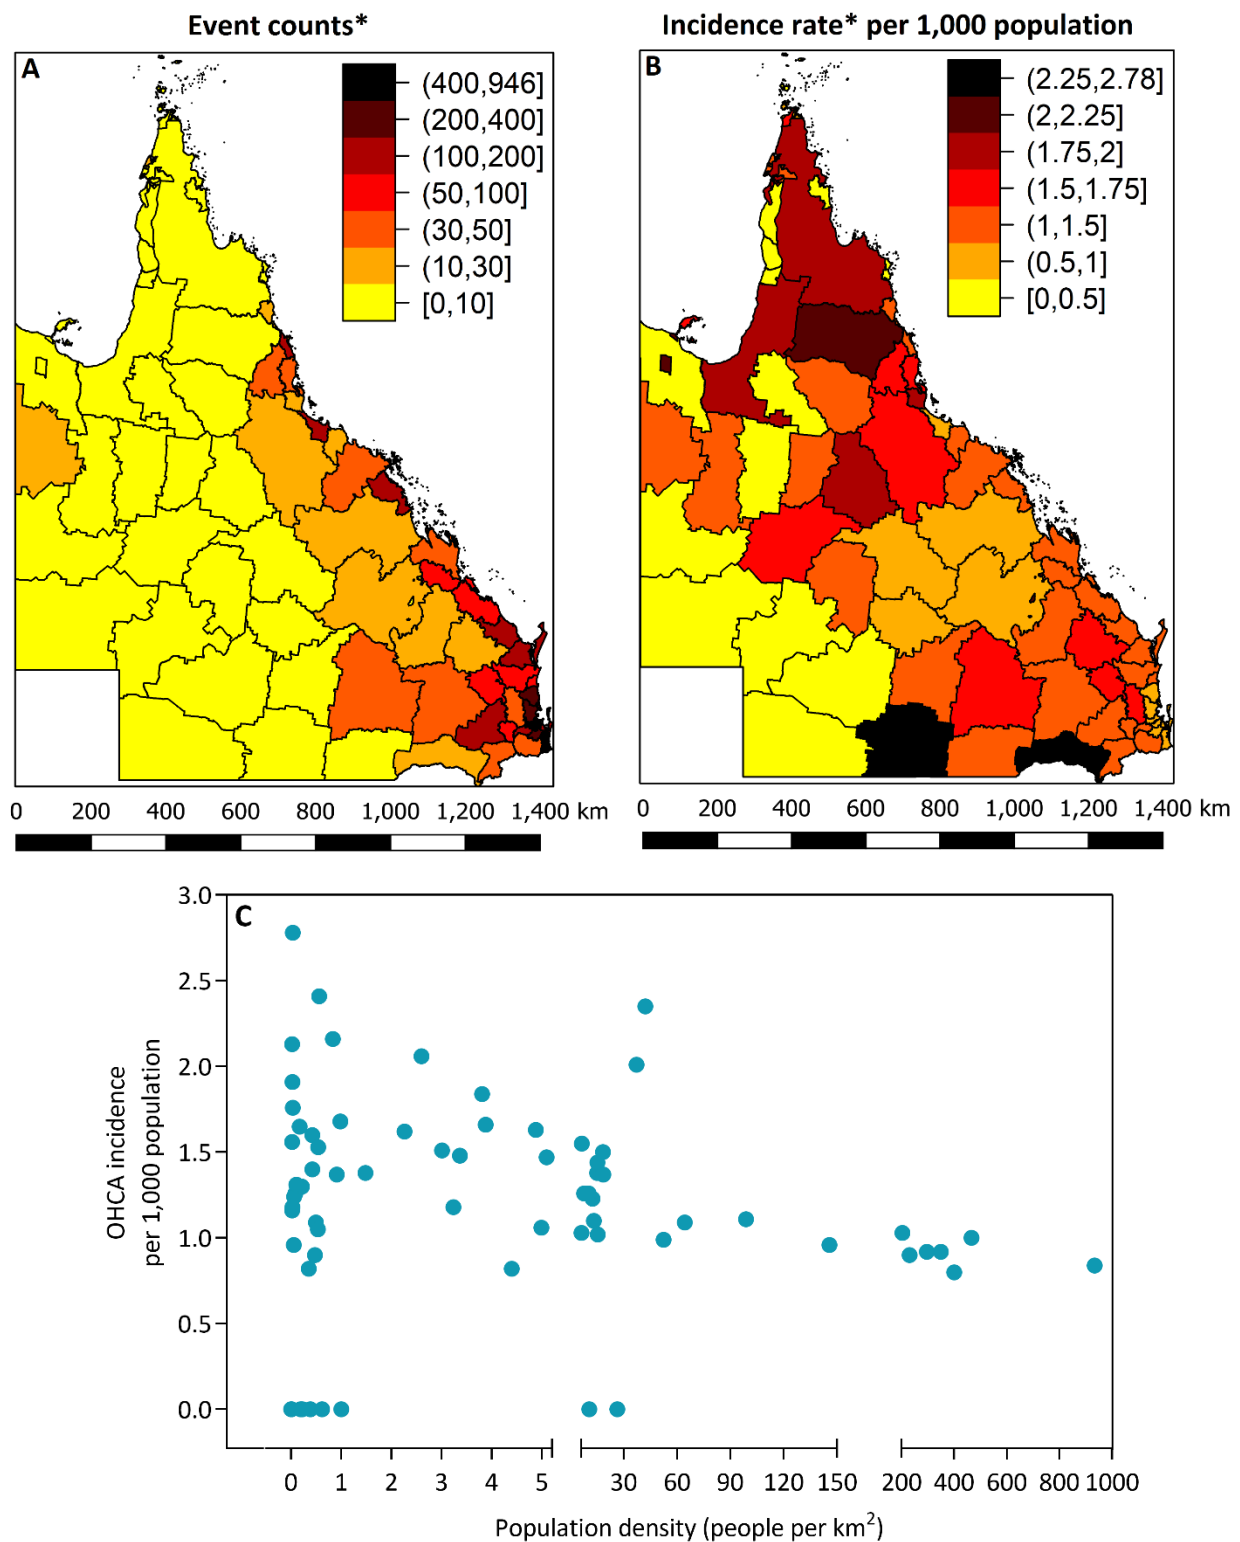

**Fig. S7** - Crude event counts (panel A), crude incidence rate per 1,000 population (panel B), and incidence versus population density (panel C), of the 78 local government areas (LGAs). \*For event counts, the map shows average number of cases per year across the study period, calculated as total number of cases for all years in each LGA divided by the number of years; For incidence rates, the map shows average incidence rates per 1,000 population per year across the study period, calculated as total number of cases across all years in each LGA divided by the number of years and over the average annual population of that LGA. Refer to Supplementary Tables S2 and S3 for LGA-specific event counts and incidence rates for individual years.

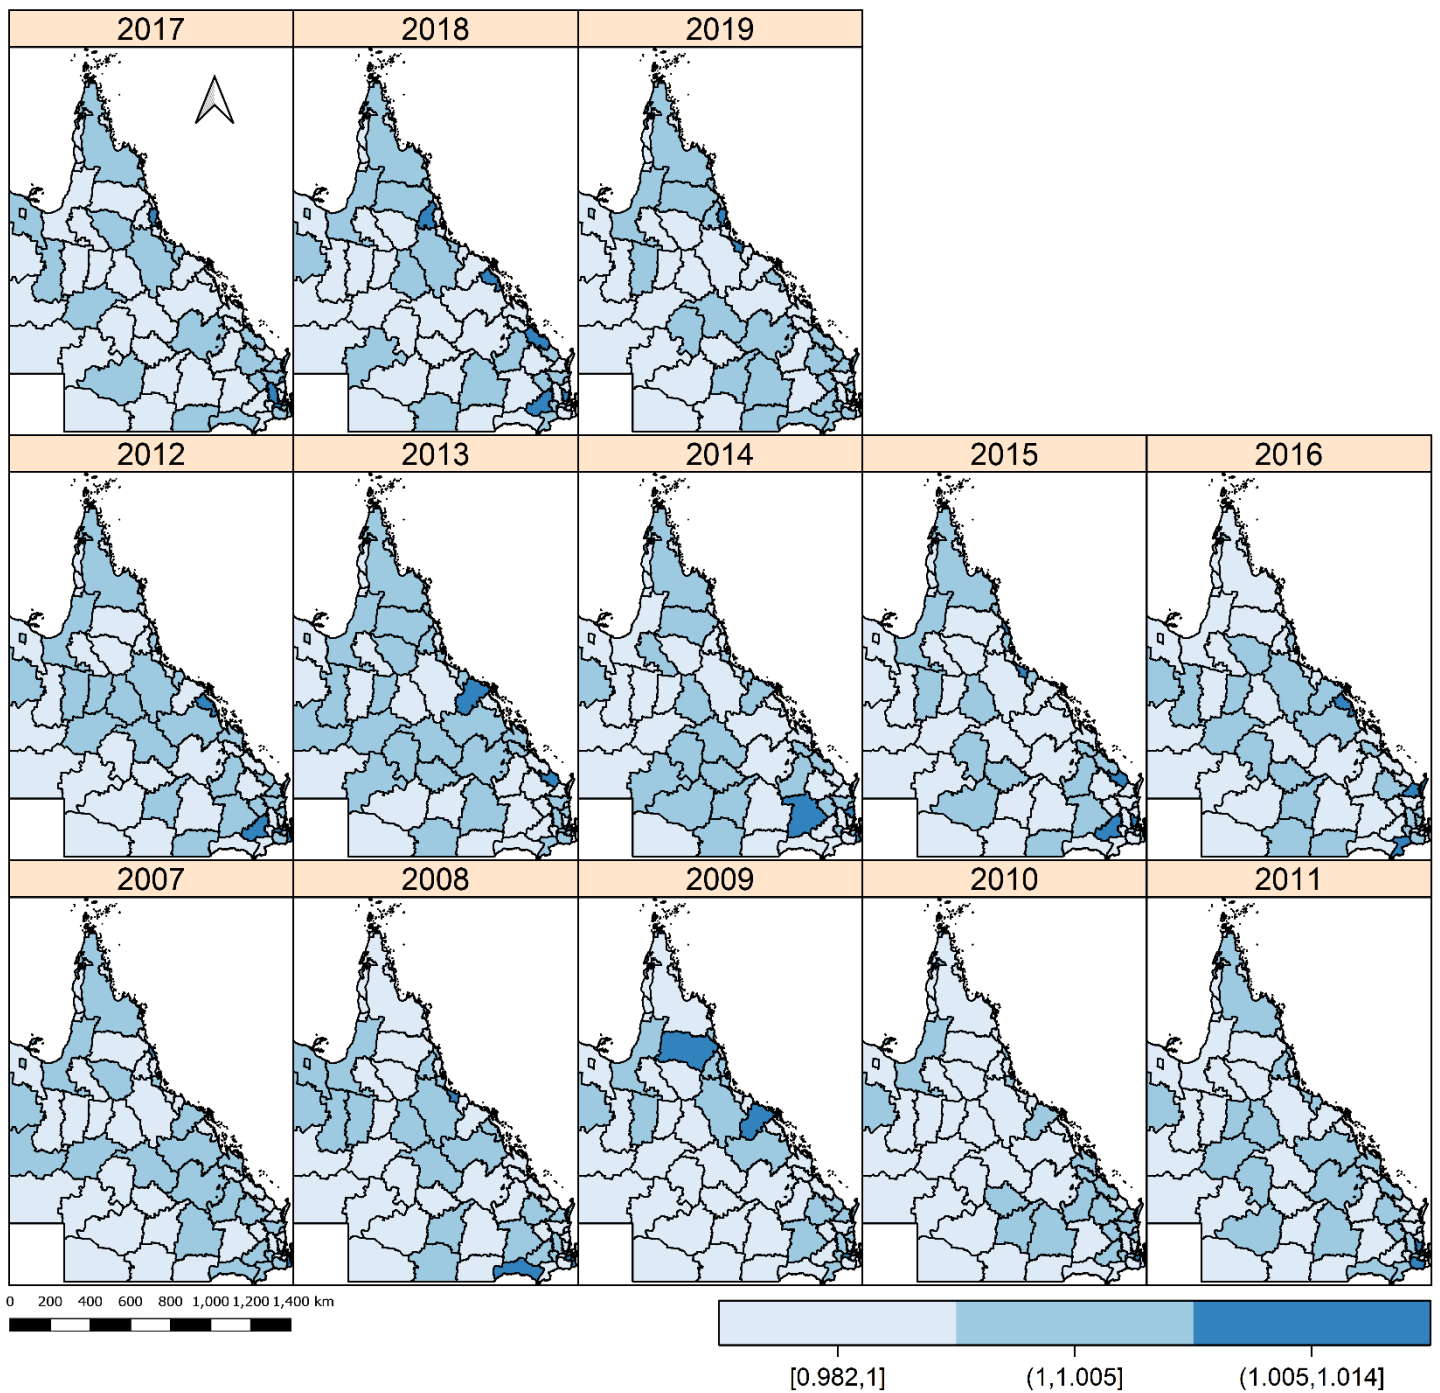

**Fig. S8** - Posterior mean of the space-time interactions for the risk of out-of-hospital cardiac arrest in Queensland.

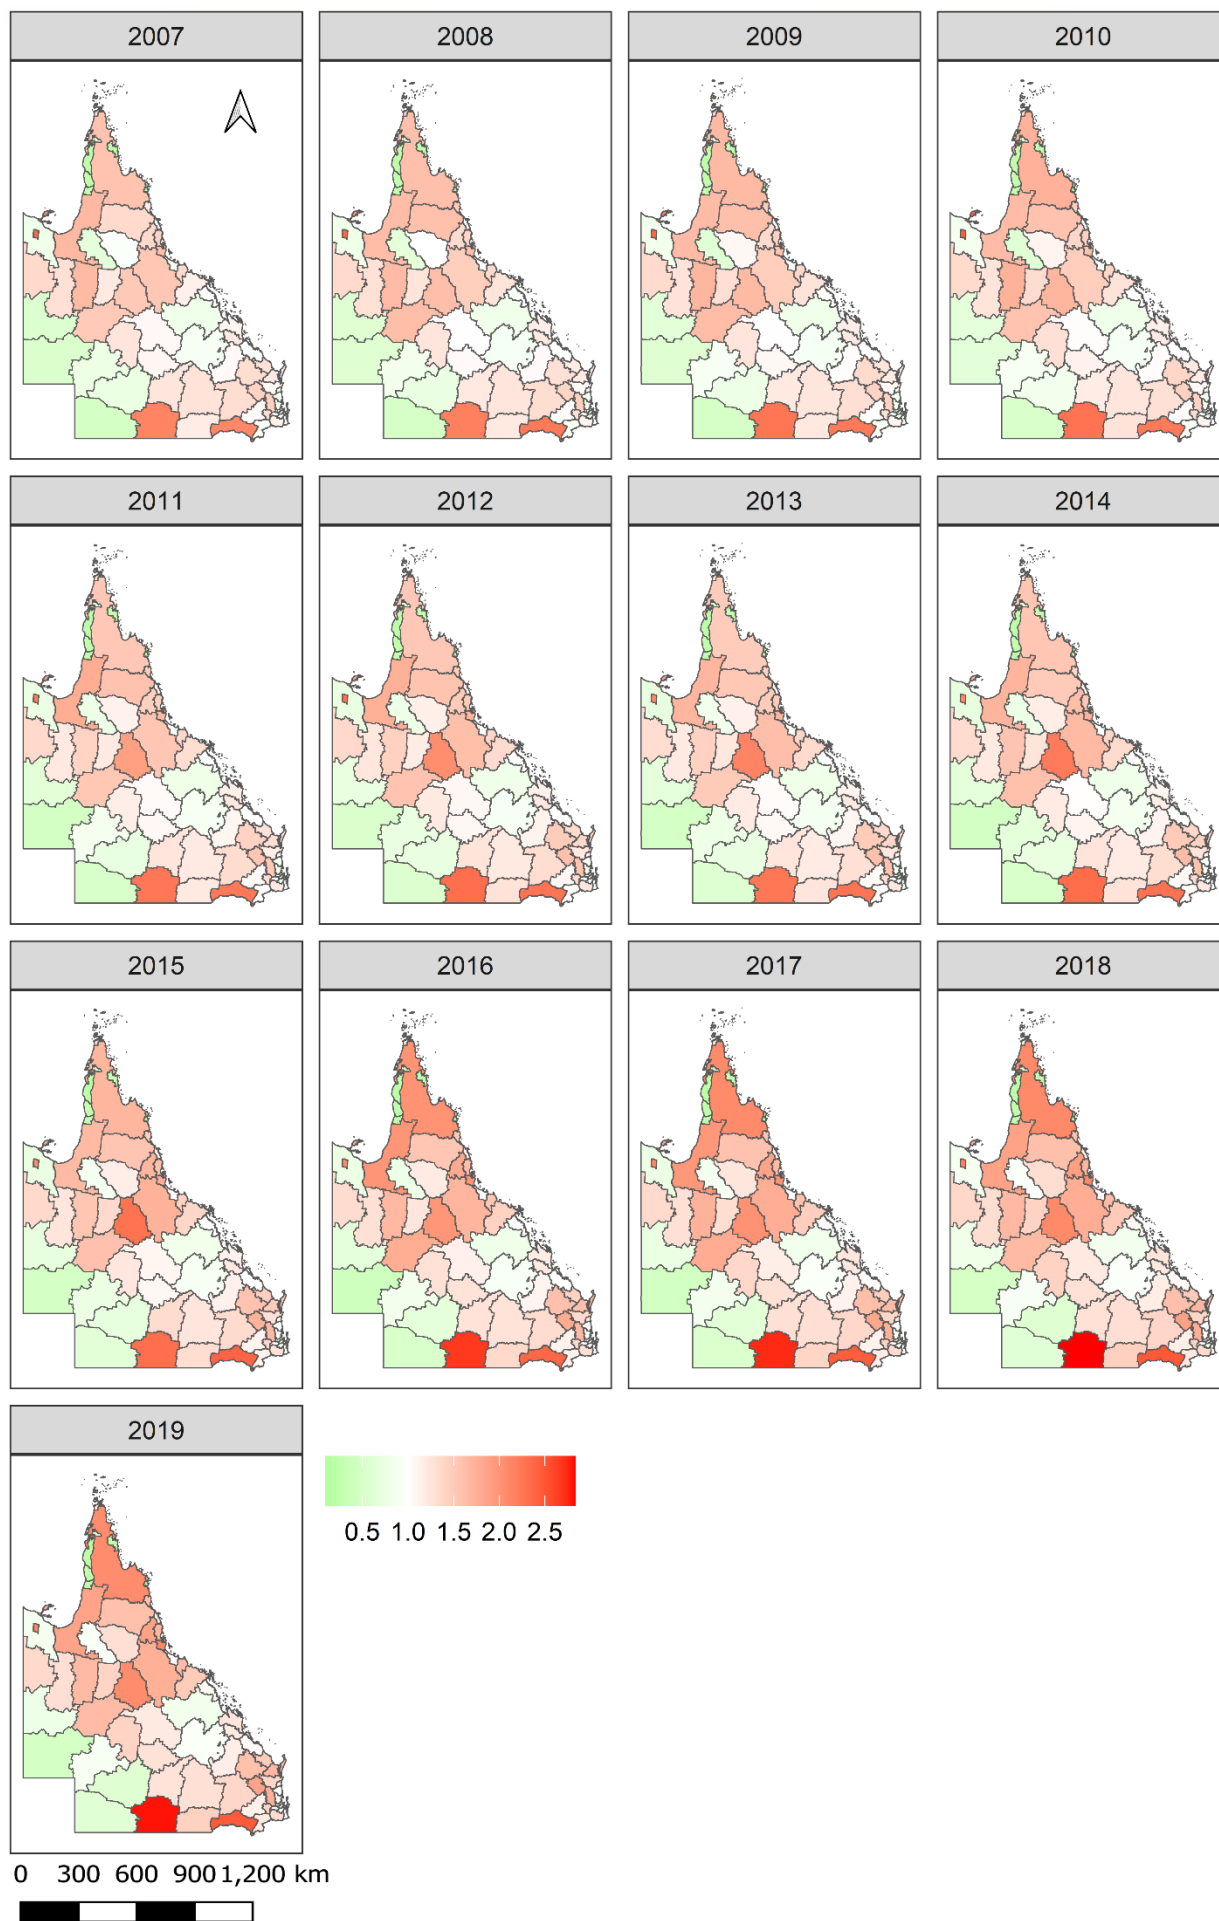

**Fig. S9** - Posterior mean of the relative risk of out-of-hospital cardiac arrest for each of the 78 local government areas over time.



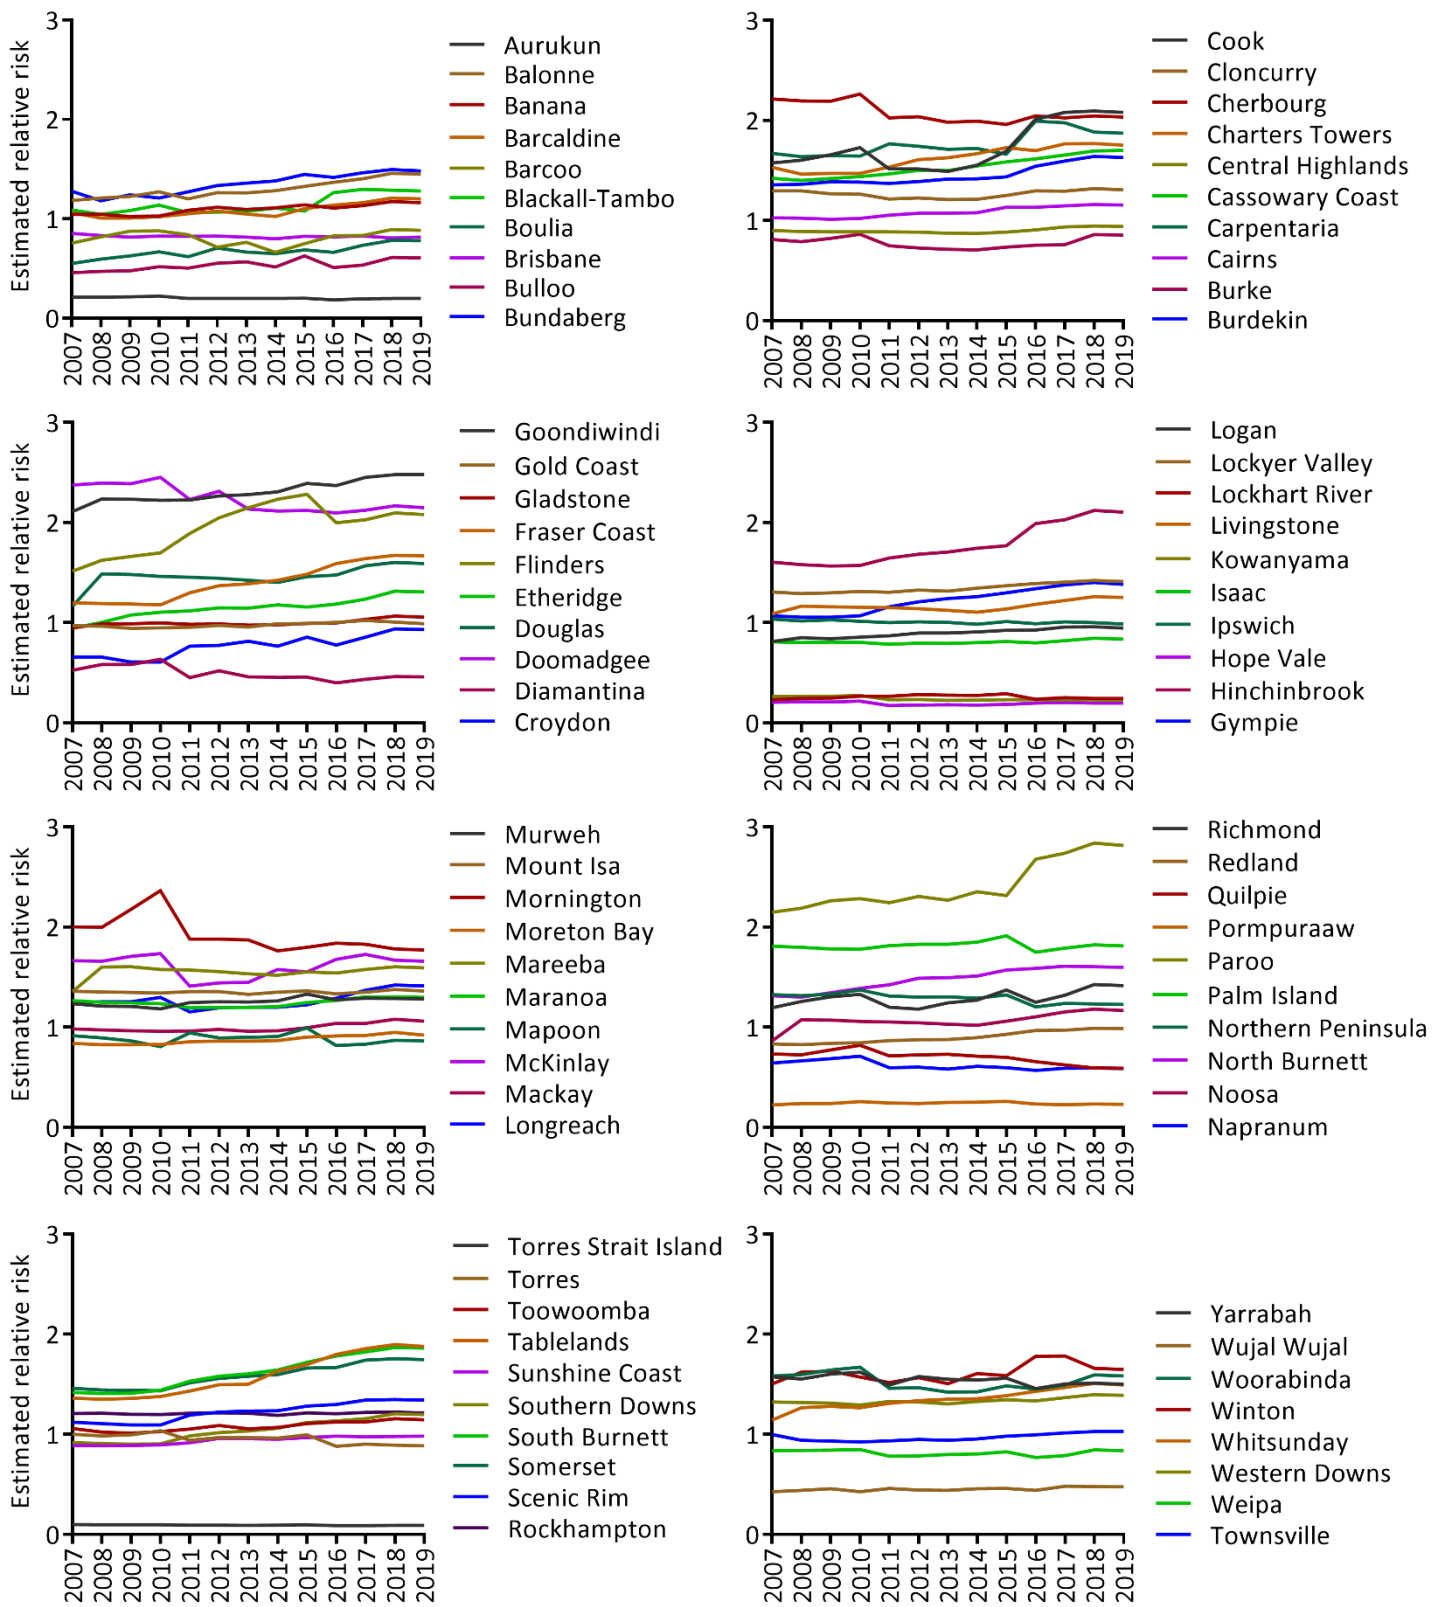

**Fig. S10** - Trend lines of posterior mean of the relative risk of out-of-hospital cardiac arrest for each of the 78 local government areas over time.

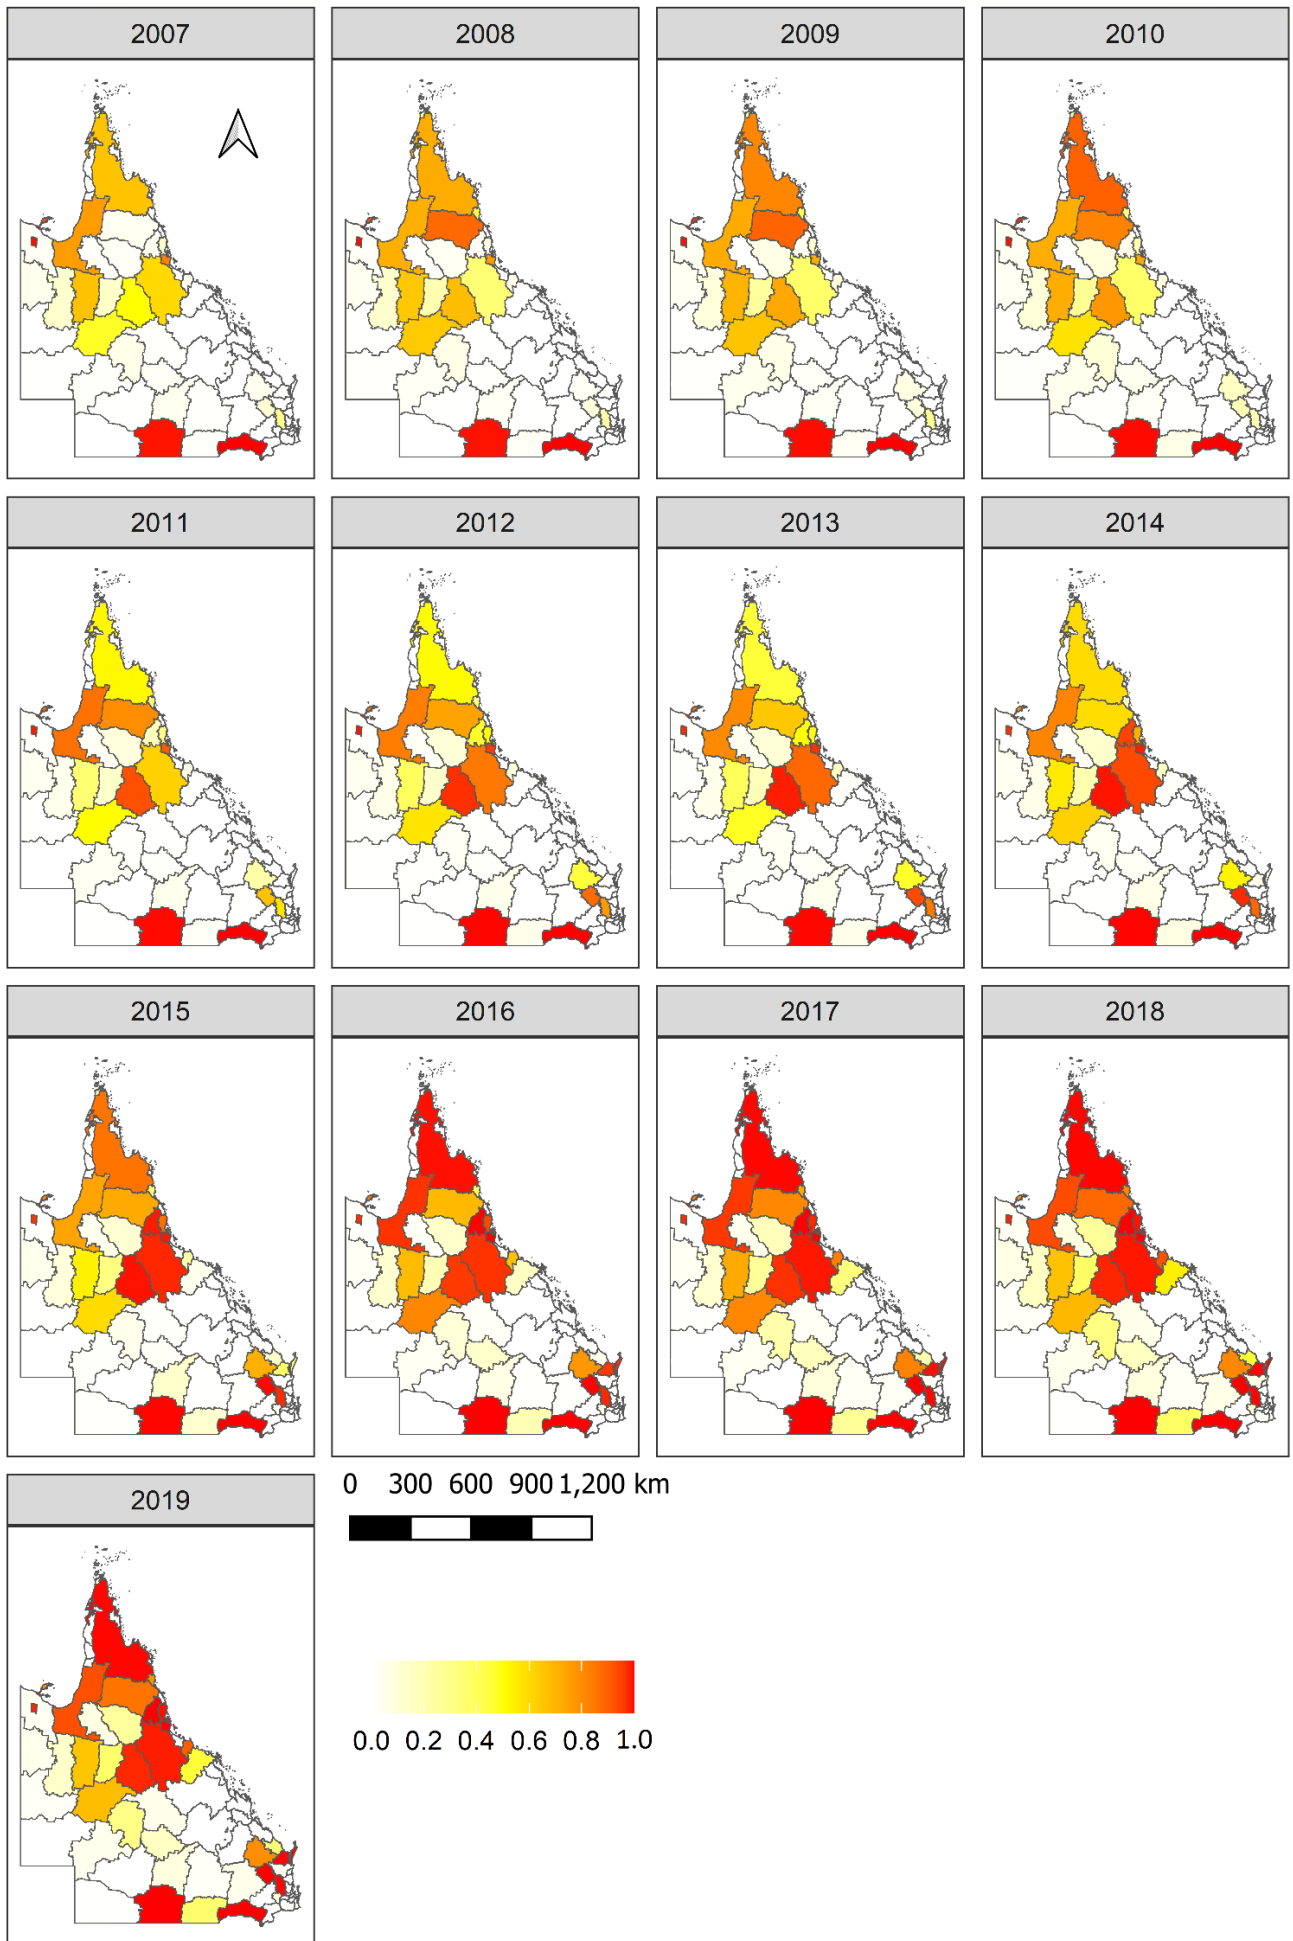

**Fig. S11** - Map of exceedance probabilities (threshold = 1.5).

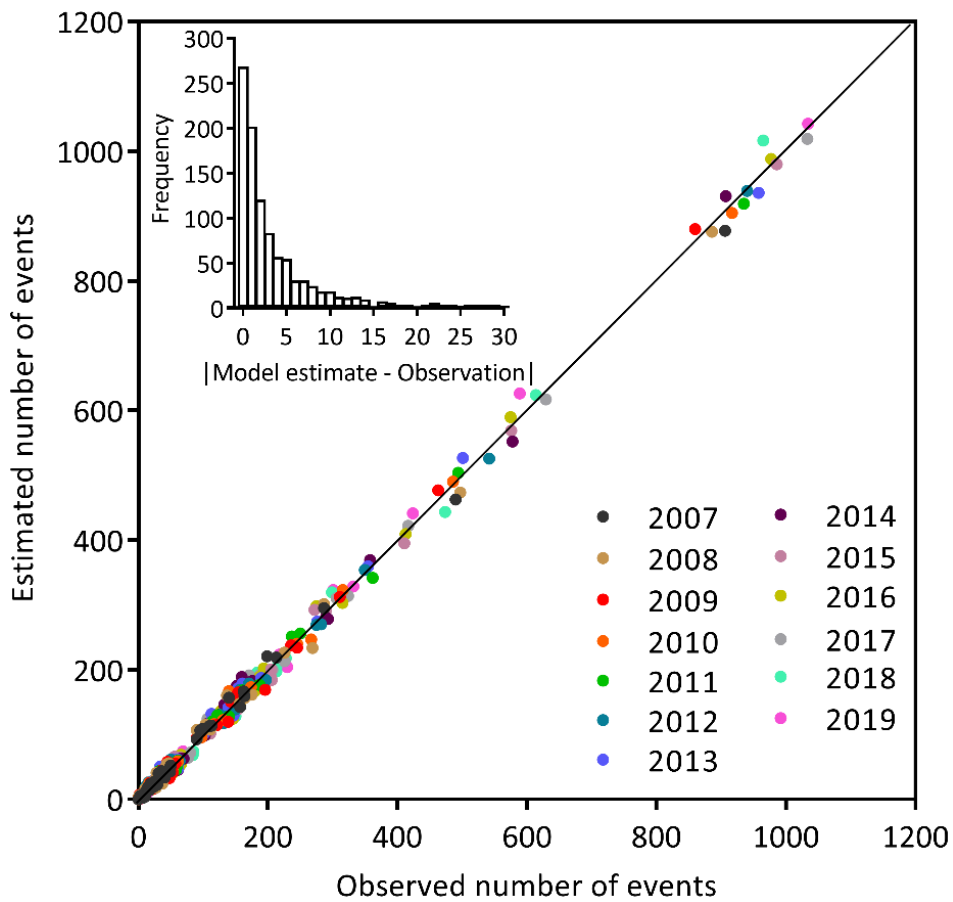

**Fig. S12** - Comparison of model estimated and observed numbers of events. The majority of the dots fall onto the line of equality, indicating an excellent agreement between model estimates and observations. This is further supported by the inset histogram of the absolute differences between model estimates and observations (aggregating across years), showing the majority of the differences are zero or only a few cases.

**Table S1.** Total annual population of each local government area (LGA) by year

| LGA               | 2007    | 2008    | 2009    | 2010    | 2011    | 2012    | 2013    | 2014    | 2015    | 2016    | 2017    | 2018    | 2019    |
|-------------------|---------|---------|---------|---------|---------|---------|---------|---------|---------|---------|---------|---------|---------|
| Aurukun           | 1164    | 1252    | 1315    | 1365    | 1398    | 1372    | 1350    | 1332    | 1321    | 1323    | 1343    | 1381    | 1418    |
| Balonne           | 4760    | 4786    | 4813    | 4833    | 4862    | 4787    | 4776    | 4726    | 4610    | 4461    | 4373    | 4333    | 4360    |
| Banana            | 14883   | 14880   | 14941   | 14855   | 14812   | 14852   | 14948   | 14860   | 14707   | 14570   | 14485   | 14287   | 14156   |
| Barcaldine        | 3338    | 3322    | 3303    | 3295    | 3292    | 3249    | 3232    | 3166    | 3082    | 2909    | 2868    | 2851    | 2849    |
| Barcoo            | 364     | 371     | 360     | 360     | 363     | 348     | 333     | 317     | 296     | 272     | 267     | 267     | 266     |
| Blackall-Tambo    | 2076    | 2124    | 2171    | 2216    | 2257    | 2236    | 2214    | 2152    | 2035    | 1925    | 1876    | 1863    | 1868    |
| Boulia            | 428     | 443     | 456     | 485     | 493     | 486     | 481     | 473     | 459     | 436     | 424     | 425     | 423     |
| Brisbane          | 1010222 | 1033472 | 1057692 | 1073144 | 1089879 | 1111798 | 1131996 | 1149107 | 1165437 | 1184752 | 1208663 | 1230938 | 1253982 |
| Bulloo            | 369     | 379     | 390     | 405     | 418     | 410     | 396     | 388     | 372     | 356     | 343     | 330     | 325     |
| Bundaberg         | 86486   | 88599   | 90335   | 91400   | 92063   | 93293   | 93850   | 94025   | 94028   | 94256   | 94697   | 95280   | 95856   |
| Burdekin          | 17568   | 17653   | 17776   | 17786   | 17775   | 17862   | 17754   | 17695   | 17566   | 17326   | 17232   | 17073   | 16971   |
| Burke             | 532     | 542     | 543     | 549     | 557     | 551     | 506     | 450     | 396     | 342     | 345     | 352     | 354     |
| Cairns            | 136251  | 141403  | 145962  | 148943  | 150992  | 154041  | 156764  | 158574  | 159944  | 161573  | 163762  | 165462  | 166862  |
| Carpentaria       | 2087    | 2124    | 2136    | 2182    | 2197    | 2170    | 2146    | 2112    | 2092    | 2051    | 1994    | 1974    | 1977    |
| Cassowary Coast   | 28706   | 28739   | 28761   | 28718   | 28636   | 28880   | 28950   | 29038   | 29098   | 29287   | 29578   | 29679   | 29794   |
| Central Highlands | 27596   | 28090   | 28714   | 29082   | 29541   | 29741   | 29782   | 29598   | 29143   | 28690   | 28604   | 28636   | 28701   |
| Charters Towers   | 11915   | 12096   | 12239   | 12316   | 12434   | 12403   | 12391   | 12367   | 12235   | 12087   | 11967   | 11849   | 11739   |
| Cherbourg         | 1190    | 1206    | 1222    | 1245    | 1264    | 1283    | 1292    | 1300    | 1304    | 1293    | 1312    | 1315    | 1331    |
| Cloncurry         | 3250    | 3308    | 3304    | 3301    | 3342    | 3359    | 3327    | 3270    | 3179    | 3125    | 3132    | 3090    | 3047    |
| Cook              | 3650    | 3787    | 3988    | 4135    | 4409    | 4215    | 4231    | 4073    | 4225    | 4310    | 4352    | 4452    | 4557    |
| Croydon           | 271     | 297     | 307     | 319     | 327     | 317     | 308     | 303     | 297     | 296     | 292     | 288     | 284     |
| Diamantina        | 290     | 295     | 296     | 293     | 292     | 295     | 299     | 303     | 301     | 296     | 287     | 292     | 291     |
| Doomadgee         | 1194    | 1235    | 1273    | 1327    | 1374    | 1368    | 1400    | 1422    | 1454    | 1475    | 1494    | 1506    | 1526    |
| Douglas           | 10768   | 10995   | 11116   | 11146   | 11186   | 11380   | 11585   | 11757   | 11877   | 12070   | 12261   | 12252   | 12367   |
| Etheridge         | 902     | 915     | 927     | 923     | 929     | 897     | 864     | 840     | 818     | 807     | 807     | 804     | 793     |
| Flinders          | 1842    | 1837    | 1834    | 1834    | 1840    | 1795    | 1754    | 1710    | 1643    | 1582    | 1519    | 1498    | 1505    |
| Fraser Coast      | 89109   | 92018   | 94813   | 96618   | 97661   | 99021   | 100290  | 101332  | 102129  | 102962  | 104042  | 105448  | 106712  |
| Gladstone         | 53587   | 55425   | 57046   | 57697   | 59461   | 60521   | 62158   | 63367   | 63697   | 63017   | 62800   | 62961   | 63412   |
| Gold Coast        | 466940  | 481569  | 495835  | 506135  | 515202  | 528342  | 540687  | 550718  | 561629  | 575303  | 591141  | 606528  | 620518  |

|                            |        |        |        |        |        |        |        |        |        |        |        |        |        |
|----------------------------|--------|--------|--------|--------|--------|--------|--------|--------|--------|--------|--------|--------|--------|
| Goondiwindi                | 10468  | 10605  | 10722  | 10823  | 10900  | 10944  | 10952  | 10902  | 10835  | 10813  | 10770  | 10725  | 10799  |
| Gympie                     | 43634  | 44700  | 45774  | 46366  | 46837  | 47786  | 48491  | 49089  | 49540  | 50327  | 51049  | 51578  | 52446  |
| Hinchinbrook               | 11822  | 11826  | 11829  | 11808  | 11817  | 11763  | 11613  | 11412  | 11181  | 10968  | 10878  | 10803  | 10687  |
| Hope Vale                  | 850    | 897    | 955    | 1011   | 1052   | 1059   | 1043   | 1030   | 1009   | 1014   | 1046   | 1081   | 1117   |
| Ipswich                    | 148133 | 154428 | 161664 | 167134 | 172200 | 178215 | 183688 | 189195 | 194274 | 200103 | 206500 | 213568 | 222307 |
| Isaac                      | 21018  | 21632  | 22237  | 22658  | 23188  | 23344  | 23284  | 22786  | 22173  | 21543  | 21182  | 20930  | 20886  |
| Kowanyama                  | 1075   | 1079   | 1088   | 1103   | 1112   | 1078   | 1042   | 1014   | 996    | 983    | 972    | 977    | 990    |
| Livingstone                | 30629  | 31407  | 32474  | 32906  | 33394  | 34381  | 35279  | 36063  | 36579  | 36950  | 37286  | 37629  | 38078  |
| Lockhart River             | 573    | 555    | 554    | 552    | 520    | 569    | 617    | 663    | 689    | 738    | 752    | 774    | 792    |
| Lockyer Valley             | 32050  | 32974  | 34333  | 35110  | 35880  | 36547  | 37682  | 38363  | 38861  | 39499  | 40219  | 40996  | 41731  |
| Logan                      | 264410 | 270628 | 277372 | 282189 | 287474 | 293974 | 300545 | 305147 | 309342 | 314511 | 320487 | 326494 | 334358 |
| Longreach                  | 4174   | 4193   | 4219   | 4250   | 4296   | 4217   | 4104   | 4027   | 3812   | 3727   | 3598   | 3529   | 3470   |
| Mackay                     | 106026 | 108644 | 111455 | 113669 | 115960 | 117495 | 118878 | 118916 | 118292 | 117218 | 116601 | 116514 | 116763 |
| McKinlay                   | 963    | 994    | 1011   | 1044   | 1085   | 1041   | 992    | 943    | 876    | 816    | 810    | 814    | 818    |
| Mapoon                     | 254    | 262    | 271    | 276    | 281    | 290    | 293    | 302    | 304    | 318    | 322    | 325    | 333    |
| Maranoa                    | 12770  | 12952  | 13113  | 13286  | 13437  | 13424  | 13515  | 13434  | 13292  | 12926  | 12847  | 12788  | 12665  |
| Mareeba                    | 19195  | 19737  | 20177  | 20495  | 20745  | 20953  | 21379  | 21542  | 21812  | 22038  | 22203  | 22511  | 22730  |
| Moreton Bay                | 344545 | 357499 | 370447 | 381357 | 390051 | 401188 | 410687 | 419764 | 428994 | 439292 | 449213 | 459456 | 469465 |
| Mornington                 | 1119   | 1120   | 1158   | 1184   | 1220   | 1218   | 1206   | 1202   | 1202   | 1197   | 1205   | 1218   | 1230   |
| Mount Isa                  | 20711  | 21381  | 21607  | 21830  | 22079  | 21958  | 21822  | 21261  | 20586  | 19606  | 19187  | 18870  | 18595  |
| Murweh                     | 4665   | 4668   | 4699   | 4714   | 4731   | 4737   | 4685   | 4639   | 4527   | 4386   | 4305   | 4317   | 4295   |
| Napranum                   | 881    | 890    | 901    | 910    | 908    | 919    | 922    | 939    | 959    | 989    | 1018   | 1047   | 1077   |
| Noosa                      | 48595  | 49600  | 50315  | 50770  | 51038  | 51678  | 52360  | 52988  | 53497  | 53922  | 54642  | 55355  | 55873  |
| North Burnett              | 10322  | 10335  | 10377  | 10358  | 10374  | 10408  | 10487  | 10547  | 10607  | 10646  | 10663  | 10624  | 10599  |
| Northern Peninsula<br>Area | 2168   | 2234   | 2273   | 2391   | 2463   | 2547   | 2620   | 2741   | 2836   | 2945   | 3001   | 3068   | 3163   |
| Palm Island                | 2162   | 2265   | 2333   | 2430   | 2538   | 2539   | 2529   | 2527   | 2550   | 2581   | 2613   | 2637   | 2671   |
| Paroo                      | 1946   | 1921   | 1909   | 1924   | 1937   | 1903   | 1849   | 1807   | 1734   | 1668   | 1649   | 1586   | 1562   |
| Porpuraaw                  | 647    | 662    | 673    | 691    | 715    | 730    | 737    | 747    | 764    | 785    | 819    | 833    | 845    |
| Quilpie                    | 994    | 992    | 996    | 1003   | 1007   | 983    | 944    | 915    | 868    | 825    | 819    | 790    | 778    |
| Redland                    | 133596 | 136771 | 139859 | 141552 | 143711 | 145719 | 147328 | 148833 | 150107 | 152216 | 154590 | 156825 | 158815 |
| Richmond                   | 908    | 895    | 898    | 873    | 847    | 841    | 839    | 838    | 820    | 806    | 802    | 806    | 810    |

|                      |        |        |        |        |        |        |        |        |        |        |        |        |        |
|----------------------|--------|--------|--------|--------|--------|--------|--------|--------|--------|--------|--------|--------|--------|
| Rockhampton          | 75195  | 76272  | 77448  | 78193  | 78939  | 80555  | 81745  | 82136  | 82026  | 81322  | 81193  | 81051  | 81512  |
| Scenic Rim           | 34983  | 35578  | 36525  | 37167  | 37437  | 37966  | 38732  | 39882  | 40307  | 40984  | 41749  | 42576  | 43123  |
| Somerset             | 19919  | 20366  | 21071  | 21717  | 22200  | 22761  | 23619  | 24459  | 24681  | 25153  | 25529  | 25881  | 26219  |
| South Burnett        | 30114  | 30583  | 31173  | 31518  | 31803  | 32340  | 32647  | 32606  | 32589  | 32625  | 32574  | 32549  | 32521  |
| Southern Downs       | 32933  | 33451  | 33976  | 34313  | 34649  | 35013  | 35501  | 35580  | 35566  | 35638  | 35566  | 35593  | 35452  |
| Sunshine Coast       | 243309 | 250800 | 258047 | 263053 | 267241 | 274828 | 281969 | 288652 | 295317 | 302841 | 311142 | 319837 | 328428 |
| Tablelands           | 23553  | 23885  | 24103  | 24230  | 24372  | 24603  | 24827  | 25060  | 25111  | 25217  | 25335  | 25535  | 25575  |
| Toowoomba            | 147927 | 150140 | 152525 | 154222 | 155473 | 157884 | 159916 | 161523 | 162775 | 164168 | 166013 | 167611 | 169008 |
| Torres               | 3418   | 3457   | 3481   | 3485   | 3477   | 3567   | 3647   | 3717   | 3753   | 3799   | 3809   | 3847   | 3887   |
| Torres Strait Island | 4577   | 4606   | 4609   | 4600   | 4578   | 4599   | 4614   | 4690   | 4731   | 4775   | 4860   | 4993   | 5104   |
| Townsville           | 163509 | 168503 | 173067 | 176528 | 180114 | 183612 | 186519 | 188777 | 190011 | 191348 | 192944 | 194019 | 195032 |
| Weipa                | 3133   | 3246   | 3303   | 3337   | 3423   | 3684   | 3811   | 3863   | 3964   | 4040   | 4156   | 4239   | 4333   |
| Western Downs        | 29520  | 30235  | 30893  | 31466  | 32365  | 32899  | 33415  | 33744  | 33867  | 34049  | 34434  | 34459  | 34585  |
| Whitsunday           | 30759  | 31337  | 31838  | 32140  | 32416  | 33397  | 34113  | 34362  | 34509  | 34538  | 34774  | 35037  | 35357  |
| Winton               | 1403   | 1372   | 1371   | 1359   | 1380   | 1345   | 1312   | 1276   | 1222   | 1154   | 1148   | 1157   | 1153   |
| Woorabinda           | 902    | 916    | 934    | 957    | 976    | 984    | 986    | 990    | 989    | 999    | 998    | 1005   | 1016   |
| Wujal Wujal          | 325    | 319    | 311    | 297    | 287    | 287    | 289    | 291    | 287    | 292    | 298    | 306    | 312    |
| Yarrabah             | 2498   | 2531   | 2535   | 2588   | 2595   | 2643   | 2686   | 2694   | 2695   | 2702   | 2799   | 2847   | 2901   |

**Table S2.** Out-of-hospital cardiac arrest (OHCA) event counts for each local government area (LGA) by year

| LGA               | 2007 | 2008 | 2009 | 2010 | 2011 | 2012 | 2013 | 2014 | 2015 | 2016 | 2017 | 2018 | 2019 |
|-------------------|------|------|------|------|------|------|------|------|------|------|------|------|------|
| Aurukun           | 0    | 0    | 0    | 0    | 0    | 0    | 0    | 0    | 0    | 0    | 0    | 0    | 0    |
| Balonne           | 5    | 2    | 4    | 6    | 4    | 11   | 6    | 5    | 7    | 9    | 7    | 6    | 7    |
| Banana            | 16   | 11   | 13   | 21   | 13   | 18   | 15   | 17   | 25   | 15   | 13   | 20   | 16   |
| Barcaldine        | 5    | 4    | 3    | 1    | 1    | 5    | 6    | 6    | 2    | 1    | 2    | 2    | 5    |
| Barcoo            | 0    | 0    | 0    | 0    | 0    | 0    | 1    | 1    | 0    | 0    | 0    | 1    | 0    |
| Blackall-Tambo    | 1    | 1    | 1    | 4    | 2    | 1    | 3    | 3    | 3    | 6    | 1    | 2    | 2    |
| Boulia            | 1    | 0    | 0    | 0    | 0    | 0    | 1    | 0    | 0    | 0    | 0    | 0    | 0    |
| Brisbane          | 906  | 886  | 860  | 917  | 935  | 940  | 958  | 907  | 986  | 977  | 1033 | 965  | 1034 |
| Bulloo            | 0    | 0    | 0    | 0    | 0    | 0    | 0    | 0    | 0    | 0    | 0    | 0    | 0    |
| Bundaberg         | 110  | 90   | 117  | 108  | 114  | 136  | 147  | 127  | 153  | 128  | 133  | 152  | 145  |
| Burdekin          | 19   | 23   | 25   | 17   | 26   | 28   | 30   | 34   | 28   | 25   | 30   | 27   | 25   |
| Burke             | 0    | 1    | 0    | 0    | 0    | 0    | 0    | 0    | 0    | 0    | 1    | 0    | 0    |
| Cairns            | 157  | 156  | 143  | 156  | 166  | 157  | 166  | 164  | 206  | 189  | 188  | 184  | 192  |
| Carpentaria       | 4    | 4    | 7    | 4    | 3    | 5    | 5    | 2    | 5    | 1    | 2    | 5    | 6    |
| Cassowary Coast   | 40   | 28   | 53   | 42   | 37   | 45   | 36   | 43   | 50   | 49   | 63   | 41   | 64   |
| Central Highlands | 27   | 24   | 19   | 23   | 27   | 22   | 27   | 24   | 22   | 25   | 39   | 27   | 38   |
| Charters Towers   | 15   | 27   | 21   | 13   | 18   | 27   | 20   | 17   | 18   | 22   | 24   | 22   | 18   |
| Cherbourg         | 1    | 2    | 0    | 1    | 3    | 4    | 1    | 1    | 4    | 4    | 6    | 2    | 7    |
| Cloncurry         | 4    | 5    | 3    | 2    | 2    | 3    | 9    | 0    | 4    | 8    | 9    | 4    | 2    |
| Cook              | 8    | 4    | 2    | 7    | 7    | 7    | 7    | 8    | 11   | 8    | 10   | 11   | 14   |
| Croydon           | 0    | 0    | 0    | 0    | 0    | 0    | 0    | 1    | 0    | 0    | 0    | 0    | 0    |
| Diamantina        | 0    | 0    | 0    | 0    | 0    | 0    | 0    | 0    | 0    | 0    | 0    | 0    | 0    |
| Doomadgee         | 4    | 4    | 3    | 2    | 0    | 5    | 4    | 2    | 2    | 1    | 3    | 8    | 4    |
| Douglas           | 12   | 16   | 24   | 12   | 13   | 16   | 23   | 13   | 20   | 11   | 22   | 22   | 22   |
| Etheridge         | 1    | 0    | 0    | 1    | 1    | 0    | 2    | 0    | 0    | 1    | 2    | 1    | 1    |
| Flinders          | 1    | 5    | 3    | 1    | 7    | 6    | 3    | 5    | 5    | 3    | 2    | 4    | 0    |
| Fraser Coast      | 100  | 112  | 121  | 117  | 122  | 150  | 139  | 133  | 154  | 180  | 177  | 174  | 185  |
| Gladstone         | 50   | 47   | 45   | 61   | 61   | 50   | 53   | 70   | 65   | 64   | 74   | 84   | 77   |
| Gold Coast        | 490  | 497  | 463  | 486  | 494  | 542  | 501  | 578  | 576  | 575  | 629  | 614  | 589  |
| Goondiwindi       | 29   | 37   | 22   | 20   | 30   | 16   | 22   | 24   | 25   | 23   | 34   | 18   | 33   |

|                         |     |     |     |     |     |     |     |     |     |     |     |     |     |
|-------------------------|-----|-----|-----|-----|-----|-----|-----|-----|-----|-----|-----|-----|-----|
| Gympie                  | 49  | 44  | 44  | 52  | 51  | 64  | 61  | 66  | 56  | 66  | 80  | 85  | 69  |
| Hinchinbrook            | 24  | 20  | 22  | 25  | 25  | 12  | 27  | 23  | 14  | 17  | 19  | 21  | 18  |
| Hope Vale               | 0   | 0   | 0   | 0   | 0   | 0   | 0   | 0   | 0   | 0   | 0   | 0   | 0   |
| Ipswich                 | 140 | 137 | 196 | 174 | 187 | 197 | 190 | 160 | 205 | 194 | 226 | 228 | 218 |
| Isaac                   | 19  | 19  | 24  | 17  | 22  | 22  | 19  | 16  | 16  | 24  | 11  | 15  | 12  |
| Kowanyama               | 0   | 0   | 0   | 0   | 0   | 0   | 0   | 0   | 0   | 0   | 0   | 0   | 0   |
| Livingstone             | 41  | 29  | 34  | 42  | 47  | 43  | 51  | 38  | 40  | 37  | 44  | 45  | 47  |
| Lockhart River          | 0   | 0   | 0   | 0   | 0   | 0   | 0   | 0   | 0   | 0   | 0   | 0   | 0   |
| Lockyer Valley          | 48  | 45  | 46  | 53  | 44  | 46  | 34  | 59  | 51  | 62  | 51  | 65  | 63  |
| Logan                   | 213 | 269 | 236 | 267 | 250 | 275 | 276 | 290 | 272 | 275 | 324 | 314 | 301 |
| Longreach               | 3   | 4   | 5   | 3   | 7   | 5   | 7   | 7   | 7   | 6   | 3   | 4   | 7   |
| Mackay                  | 96  | 111 | 105 | 110 | 107 | 132 | 108 | 106 | 116 | 146 | 107 | 150 | 127 |
| McKinlay                | 0   | 2   | 5   | 1   | 1   | 2   | 1   | 0   | 3   | 1   | 1   | 1   | 4   |
| Mapoon                  | 0   | 0   | 0   | 0   | 0   | 0   | 1   | 1   | 0   | 0   | 0   | 1   | 0   |
| Maranoa                 | 18  | 11  | 13  | 17  | 23  | 14  | 17  | 16  | 12  | 16  | 16  | 20  | 24  |
| Mareeba                 | 24  | 29  | 48  | 30  | 31  | 29  | 34  | 39  | 28  | 31  | 34  | 39  | 40  |
| Moreton Bay             | 287 | 287 | 311 | 316 | 362 | 350 | 355 | 358 | 411 | 413 | 417 | 474 | 424 |
| Mornington              | 7   | 0   | 2   | 3   | 6   | 1   | 3   | 1   | 0   | 2   | 2   | 2   | 3   |
| Mount Isa               | 29  | 33  | 33  | 30  | 32  | 31  | 24  | 39  | 24  | 32  | 16  | 30  | 20  |
| Murweh                  | 3   | 7   | 5   | 8   | 5   | 7   | 5   | 7   | 6   | 7   | 2   | 5   | 9   |
| Napranum                | 0   | 0   | 0   | 2   | 0   | 4   | 1   | 0   | 0   | 1   | 0   | 0   | 0   |
| Noosa                   | 49  | 44  | 57  | 47  | 46  | 50  | 54  | 57  | 63  | 65  | 77  | 70  | 63  |
| North Burnett           | 17  | 14  | 15  | 16  | 17  | 13  | 11  | 11  | 14  | 20  | 20  | 15  | 22  |
| Northern Peninsula Area | 1   | 2   | 4   | 7   | 2   | 3   | 1   | 5   | 3   | 2   | 7   | 1   | 8   |
| Palm Island             | 4   | 3   | 4   | 10  | 7   | 6   | 3   | 1   | 5   | 4   | 7   | 2   | 6   |
| Paroo                   | 4   | 5   | 0   | 3   | 2   | 3   | 9   | 8   | 4   | 8   | 4   | 7   | 3   |
| Pormpuraaw              | 0   | 0   | 0   | 0   | 0   | 0   | 0   | 0   | 0   | 0   | 0   | 0   | 0   |
| Quilpie                 | 0   | 0   | 0   | 0   | 1   | 0   | 0   | 3   | 1   | 0   | 1   | 0   | 0   |
| Redland                 | 113 | 104 | 139 | 131 | 140 | 126 | 113 | 138 | 145 | 157 | 138 | 151 | 164 |
| Richmond                | 1   | 1   | 0   | 1   | 3   | 1   | 5   | 0   | 1   | 2   | 0   | 0   | 0   |
| Rockhampton             | 90  | 91  | 90  | 98  | 96  | 98  | 101 | 103 | 111 | 105 | 100 | 96  | 99  |
| Scenic Rim              | 41  | 32  | 32  | 35  | 58  | 52  | 55  | 40  | 46  | 66  | 63  | 56  | 59  |



|                      |     |     |     |     |     |     |     |     |     |     |     |     |     |
|----------------------|-----|-----|-----|-----|-----|-----|-----|-----|-----|-----|-----|-----|-----|
| Somerset             | 29  | 30  | 35  | 30  | 45  | 29  | 40  | 37  | 40  | 43  | 59  | 38  | 40  |
| South Burnett        | 36  | 42  | 37  | 52  | 59  | 53  | 47  | 55  | 56  | 57  | 61  | 63  | 70  |
| Southern Downs       | 31  | 26  | 35  | 28  | 41  | 34  | 44  | 30  | 37  | 54  | 32  | 44  | 44  |
| Sunshine Coast       | 199 | 226 | 245 | 245 | 237 | 282 | 276 | 293 | 290 | 315 | 306 | 299 | 332 |
| Tablelands           | 31  | 36  | 38  | 34  | 38  | 35  | 39  | 38  | 41  | 35  | 40  | 62  | 54  |
| Toowoomba            | 164 | 164 | 142 | 167 | 161 | 194 | 154 | 152 | 203 | 187 | 171 | 213 | 209 |
| Torres               | 7   | 0   | 0   | 5   | 6   | 1   | 3   | 2   | 5   | 2   | 8   | 1   | 5   |
| Torres Strait Island | 0   | 0   | 0   | 0   | 0   | 0   | 0   | 0   | 0   | 0   | 0   | 0   | 0   |
| Townsville           | 163 | 175 | 154 | 140 | 174 | 171 | 161 | 176 | 204 | 194 | 207 | 213 | 230 |
| Weipa                | 6   | 7   | 5   | 0   | 0   | 3   | 3   | 1   | 3   | 1   | 5   | 4   | 2   |
| Western Downs        | 31  | 43  | 47  | 35  | 40  | 55  | 41  | 61  | 48  | 41  | 43  | 47  | 48  |
| Whitsunday           | 41  | 37  | 54  | 44  | 32  | 41  | 61  | 50  | 39  | 57  | 48  | 53  | 45  |
| Winton               | 3   | 2   | 2   | 1   | 3   | 4   | 2   | 2   | 1   | 3   | 4   | 0   | 1   |
| Woorabinda           | 1   | 0   | 2   | 1   | 3   | 2   | 1   | 3   | 1   | 2   | 1   | 1   | 3   |
| Wujal Wujal          | 0   | 0   | 0   | 0   | 0   | 0   | 0   | 0   | 0   | 0   | 0   | 0   | 0   |
| Yarrabah             | 10  | 5   | 3   | 4   | 5   | 2   | 2   | 1   | 3   | 4   | 5   | 5   | 6   |

**Table S3.** Out-of-hospital cardiac arrest (OHCA) incidence rate per 1,000 population for each local government area (LGA) by year

| LGA               | 2007 | 2008 | 2009 | 2010 | 2011 | 2012 | 2013 | 2014 | 2015 | 2016 | 2017 | 2018 | 2019 |
|-------------------|------|------|------|------|------|------|------|------|------|------|------|------|------|
| Aurukun           | 0    | 0    | 0    | 0    | 0    | 0    | 0    | 0    | 0    | 0    | 0    | 0    | 0    |
| Balonne           | 1.05 | 0.42 | 0.83 | 1.24 | 0.82 | 2.3  | 1.26 | 1.06 | 1.52 | 2.02 | 1.6  | 1.38 | 1.61 |
| Banana            | 1.08 | 0.74 | 0.87 | 1.41 | 0.88 | 1.21 | 1    | 1.14 | 1.7  | 1.03 | 0.9  | 1.4  | 1.13 |
| Barcardine        | 1.5  | 1.2  | 0.91 | 0.3  | 0.3  | 1.54 | 1.86 | 1.9  | 0.65 | 0.34 | 0.7  | 0.7  | 1.76 |
| Barcoo            | 0    | 0    | 0    | 0    | 0    | 0    | 3    | 3.15 | 0    | 0    | 0    | 3.75 | 0    |
| Blackall-Tambo    | 0.48 | 0.47 | 0.46 | 1.81 | 0.89 | 0.45 | 1.36 | 1.39 | 1.47 | 3.12 | 0.53 | 1.07 | 1.07 |
| Boulia            | 2.34 | 0    | 0    | 0    | 0    | 0    | 2.08 | 0    | 0    | 0    | 0    | 0    | 0    |
| Brisbane          | 0.9  | 0.86 | 0.81 | 0.85 | 0.86 | 0.85 | 0.85 | 0.79 | 0.85 | 0.82 | 0.85 | 0.78 | 0.82 |
| Bulloo            | 0    | 0    | 0    | 0    | 0    | 0    | 0    | 0    | 0    | 0    | 0    | 0    | 0    |
| Bundaberg         | 1.27 | 1.02 | 1.3  | 1.18 | 1.24 | 1.46 | 1.57 | 1.35 | 1.63 | 1.36 | 1.4  | 1.6  | 1.51 |
| Burdekin          | 1.08 | 1.3  | 1.41 | 0.96 | 1.46 | 1.57 | 1.69 | 1.92 | 1.59 | 1.44 | 1.74 | 1.58 | 1.47 |
| Burke             | 0    | 1.85 | 0    | 0    | 0    | 0    | 0    | 0    | 0    | 0    | 2.9  | 0    | 0    |
| Cairns            | 1.15 | 1.1  | 0.98 | 1.05 | 1.1  | 1.02 | 1.06 | 1.03 | 1.29 | 1.17 | 1.15 | 1.11 | 1.15 |
| Carpentaria       | 1.92 | 1.88 | 3.28 | 1.83 | 1.37 | 2.3  | 2.33 | 0.95 | 2.39 | 0.49 | 1    | 2.53 | 3.03 |
| Cassowary Coast   | 1.39 | 0.97 | 1.84 | 1.46 | 1.29 | 1.56 | 1.24 | 1.48 | 1.72 | 1.67 | 2.13 | 1.38 | 2.15 |
| Central Highlands | 0.98 | 0.85 | 0.66 | 0.79 | 0.91 | 0.74 | 0.91 | 0.81 | 0.75 | 0.87 | 1.36 | 0.94 | 1.32 |
| Charters Towers   | 1.26 | 2.23 | 1.72 | 1.06 | 1.45 | 2.18 | 1.61 | 1.37 | 1.47 | 1.82 | 2.01 | 1.86 | 1.53 |
| Cherbourg         | 0.84 | 1.66 | 0    | 0.8  | 2.37 | 3.12 | 0.77 | 0.77 | 3.07 | 3.09 | 4.57 | 1.52 | 5.26 |
| Cloncurry         | 1.23 | 1.51 | 0.91 | 0.61 | 0.6  | 0.89 | 2.71 | 0    | 1.26 | 2.56 | 2.87 | 1.29 | 0.66 |
| Cook              | 2.19 | 1.06 | 0.5  | 1.69 | 1.59 | 1.66 | 1.65 | 1.96 | 2.6  | 1.86 | 2.3  | 2.47 | 3.07 |
| Croydon           | 0    | 0    | 0    | 0    | 0    | 0    | 0    | 3.3  | 0    | 0    | 0    | 0    | 0    |
| Diamantina        | 0    | 0    | 0    | 0    | 0    | 0    | 0    | 0    | 0    | 0    | 0    | 0    | 0    |
| Doomadgee         | 3.35 | 3.24 | 2.36 | 1.51 | 0    | 3.65 | 2.86 | 1.41 | 1.38 | 0.68 | 2.01 | 5.31 | 2.62 |
| Douglas           | 1.11 | 1.46 | 2.16 | 1.08 | 1.16 | 1.41 | 1.99 | 1.11 | 1.68 | 0.91 | 1.79 | 1.8  | 1.78 |
| Etheridge         | 1.11 | 0    | 0    | 1.08 | 1.08 | 0    | 2.31 | 0    | 0    | 1.24 | 2.48 | 1.24 | 1.26 |
| Flinders          | 0.54 | 2.72 | 1.64 | 0.55 | 3.8  | 3.34 | 1.71 | 2.92 | 3.04 | 1.9  | 1.32 | 2.67 | 0    |
| Fraser Coast      | 1.12 | 1.22 | 1.28 | 1.21 | 1.25 | 1.51 | 1.39 | 1.31 | 1.51 | 1.75 | 1.7  | 1.65 | 1.73 |
| Gladstone         | 0.93 | 0.85 | 0.79 | 1.06 | 1.03 | 0.83 | 0.85 | 1.1  | 1.02 | 1.02 | 1.18 | 1.33 | 1.21 |

|                         |      |      |      |      |      |      |      |      |      |      |      |      |      |
|-------------------------|------|------|------|------|------|------|------|------|------|------|------|------|------|
| Gold Coast              | 1.05 | 1.03 | 0.93 | 0.96 | 0.96 | 1.03 | 0.93 | 1.05 | 1.03 | 1    | 1.06 | 1.01 | 0.95 |
| Goondiwindi             | 2.77 | 3.49 | 2.05 | 1.85 | 2.75 | 1.46 | 2.01 | 2.2  | 2.31 | 2.13 | 3.16 | 1.68 | 3.06 |
| Gympie                  | 1.12 | 0.98 | 0.96 | 1.12 | 1.09 | 1.34 | 1.26 | 1.34 | 1.13 | 1.31 | 1.57 | 1.65 | 1.32 |
| Hinchinbrook            | 2.03 | 1.69 | 1.86 | 2.12 | 2.12 | 1.02 | 2.32 | 2.02 | 1.25 | 1.55 | 1.75 | 1.94 | 1.68 |
| Hope Vale               | 0    | 0    | 0    | 0    | 0    | 0    | 0    | 0    | 0    | 0    | 0    | 0    | 0    |
| Ipswich                 | 0.95 | 0.89 | 1.21 | 1.04 | 1.09 | 1.11 | 1.03 | 0.85 | 1.06 | 0.97 | 1.09 | 1.07 | 0.98 |
| Isaac                   | 0.9  | 0.88 | 1.08 | 0.75 | 0.95 | 0.94 | 0.82 | 0.7  | 0.72 | 1.11 | 0.52 | 0.72 | 0.57 |
| Kowanyama               | 0    | 0    | 0    | 0    | 0    | 0    | 0    | 0    | 0    | 0    | 0    | 0    | 0    |
| Livingstone             | 1.34 | 0.92 | 1.05 | 1.28 | 1.41 | 1.25 | 1.45 | 1.05 | 1.09 | 1    | 1.18 | 1.2  | 1.23 |
| Lockhart River          | 0    | 0    | 0    | 0    | 0    | 0    | 0    | 0    | 0    | 0    | 0    | 0    | 0    |
| Lockyer Valley          | 1.5  | 1.36 | 1.34 | 1.51 | 1.23 | 1.26 | 0.9  | 1.54 | 1.31 | 1.57 | 1.27 | 1.59 | 1.51 |
| Logan                   | 0.81 | 0.99 | 0.85 | 0.95 | 0.87 | 0.94 | 0.92 | 0.95 | 0.88 | 0.87 | 1.01 | 0.96 | 0.9  |
| Longreach               | 0.72 | 0.95 | 1.19 | 0.71 | 1.63 | 1.19 | 1.71 | 1.74 | 1.84 | 1.61 | 0.83 | 1.13 | 2.02 |
| Mackay                  | 0.91 | 1.02 | 0.94 | 0.97 | 0.92 | 1.12 | 0.91 | 0.89 | 0.98 | 1.25 | 0.92 | 1.29 | 1.09 |
| McKinlay                | 0    | 2.01 | 4.95 | 0.96 | 0.92 | 1.92 | 1.01 | 0    | 3.42 | 1.23 | 1.23 | 1.23 | 4.89 |
| Mapoon                  | 0    | 0    | 0    | 0    | 0    | 0    | 3.41 | 3.31 | 0    | 0    | 0    | 3.08 | 0    |
| Maranoa                 | 1.41 | 0.85 | 0.99 | 1.28 | 1.71 | 1.04 | 1.26 | 1.19 | 0.9  | 1.24 | 1.25 | 1.56 | 1.89 |
| Mareeba                 | 1.25 | 1.47 | 2.38 | 1.46 | 1.49 | 1.38 | 1.59 | 1.81 | 1.28 | 1.41 | 1.53 | 1.73 | 1.76 |
| Moreton Bay             | 0.83 | 0.8  | 0.84 | 0.83 | 0.93 | 0.87 | 0.86 | 0.85 | 0.96 | 0.94 | 0.93 | 1.03 | 0.9  |
| Mornington              | 6.26 | 0    | 1.73 | 2.53 | 4.92 | 0.82 | 2.49 | 0.83 | 0    | 1.67 | 1.66 | 1.64 | 2.44 |
| Mount Isa               | 1.4  | 1.54 | 1.53 | 1.37 | 1.45 | 1.41 | 1.1  | 1.83 | 1.17 | 1.63 | 0.83 | 1.59 | 1.08 |
| Murweh                  | 0.64 | 1.5  | 1.06 | 1.7  | 1.06 | 1.48 | 1.07 | 1.51 | 1.33 | 1.6  | 0.46 | 1.16 | 2.1  |
| Napranum                | 0    | 0    | 0    | 2.2  | 0    | 4.35 | 1.08 | 0    | 0    | 1.01 | 0    | 0    | 0    |
| Noosa                   | 1.01 | 0.89 | 1.13 | 0.93 | 0.9  | 0.97 | 1.03 | 1.08 | 1.18 | 1.21 | 1.41 | 1.26 | 1.13 |
| North Burnett           | 1.65 | 1.35 | 1.45 | 1.54 | 1.64 | 1.25 | 1.05 | 1.04 | 1.32 | 1.88 | 1.88 | 1.41 | 2.08 |
| Northern Peninsula Area | 0.46 | 0.9  | 1.76 | 2.93 | 0.81 | 1.18 | 0.38 | 1.82 | 1.06 | 0.68 | 2.33 | 0.33 | 2.53 |
| Palm Island             | 1.85 | 1.32 | 1.71 | 4.12 | 2.76 | 2.36 | 1.19 | 0.4  | 1.96 | 1.55 | 2.68 | 0.76 | 2.25 |
| Paroo                   | 2.06 | 2.6  | 0    | 1.56 | 1.03 | 1.58 | 4.87 | 4.43 | 2.31 | 4.8  | 2.43 | 4.41 | 1.92 |
| Pormpuraaw              | 0    | 0    | 0    | 0    | 0    | 0    | 0    | 0    | 0    | 0    | 0    | 0    | 0    |
| Quilpie                 | 0    | 0    | 0    | 0    | 0.99 | 0    | 0    | 3.28 | 1.15 | 0    | 1.22 | 0    | 0    |
| Redland                 | 0.85 | 0.76 | 0.99 | 0.93 | 0.97 | 0.86 | 0.77 | 0.93 | 0.97 | 1.03 | 0.89 | 0.96 | 1.03 |
| Richmond                | 1.1  | 1.12 | 0    | 1.15 | 3.54 | 1.19 | 5.96 | 0    | 1.22 | 2.48 | 0    | 0    | 0    |

|                      |      |      |      |      |      |      |      |      |      |      |      |      |      |
|----------------------|------|------|------|------|------|------|------|------|------|------|------|------|------|
| Rockhampton          | 1.2  | 1.19 | 1.16 | 1.25 | 1.22 | 1.22 | 1.24 | 1.25 | 1.35 | 1.29 | 1.23 | 1.18 | 1.21 |
| Scenic Rim           | 1.17 | 0.9  | 0.88 | 0.94 | 1.55 | 1.37 | 1.42 | 1    | 1.14 | 1.61 | 1.51 | 1.32 | 1.37 |
| Somerset             | 1.46 | 1.47 | 1.66 | 1.38 | 2.03 | 1.27 | 1.69 | 1.51 | 1.62 | 1.71 | 2.31 | 1.47 | 1.53 |
| South Burnett        | 1.2  | 1.37 | 1.19 | 1.65 | 1.86 | 1.64 | 1.44 | 1.69 | 1.72 | 1.75 | 1.87 | 1.94 | 2.15 |
| Southern Downs       | 0.94 | 0.78 | 1.03 | 0.82 | 1.18 | 0.97 | 1.24 | 0.84 | 1.04 | 1.52 | 0.9  | 1.24 | 1.24 |
| Sunshine Coast       | 0.82 | 0.9  | 0.95 | 0.93 | 0.89 | 1.03 | 0.98 | 1.02 | 0.98 | 1.04 | 0.98 | 0.93 | 1.01 |
| Tablelands           | 1.32 | 1.51 | 1.58 | 1.4  | 1.56 | 1.42 | 1.57 | 1.52 | 1.63 | 1.39 | 1.58 | 2.43 | 2.11 |
| Toowoomba            | 1.11 | 1.09 | 0.93 | 1.08 | 1.04 | 1.23 | 0.96 | 0.94 | 1.25 | 1.14 | 1.03 | 1.27 | 1.24 |
| Torres               | 2.05 | 0    | 0    | 1.43 | 1.73 | 0.28 | 0.82 | 0.54 | 1.33 | 0.53 | 2.1  | 0.26 | 1.29 |
| Torres Strait Island | 0    | 0    | 0    | 0    | 0    | 0    | 0    | 0    | 0    | 0    | 0    | 0    | 0    |
| Townsville           | 1    | 1.04 | 0.89 | 0.79 | 0.97 | 0.93 | 0.86 | 0.93 | 1.07 | 1.01 | 1.07 | 1.1  | 1.18 |
| Weipa                | 1.92 | 2.16 | 1.51 | 0    | 0    | 0.81 | 0.79 | 0.26 | 0.76 | 0.25 | 1.2  | 0.94 | 0.46 |
| Western Downs        | 1.05 | 1.42 | 1.52 | 1.11 | 1.24 | 1.67 | 1.23 | 1.81 | 1.42 | 1.2  | 1.25 | 1.36 | 1.39 |
| Whitsunday           | 1.33 | 1.18 | 1.7  | 1.37 | 0.99 | 1.23 | 1.79 | 1.46 | 1.13 | 1.65 | 1.38 | 1.51 | 1.27 |
| Winton               | 2.14 | 1.46 | 1.46 | 0.74 | 2.17 | 2.97 | 1.52 | 1.57 | 0.82 | 2.6  | 3.48 | 0    | 0.87 |
| Woorabinda           | 1.11 | 0    | 2.14 | 1.04 | 3.07 | 2.03 | 1.01 | 3.03 | 1.01 | 2    | 1    | 1    | 2.95 |
| Wujal Wujal          | 0    | 0    | 0    | 0    | 0    | 0    | 0    | 0    | 0    | 0    | 0    | 0    | 0    |
| Yarrabah             | 4    | 1.98 | 1.18 | 1.55 | 1.93 | 0.76 | 0.74 | 0.37 | 1.11 | 1.48 | 1.79 | 1.76 | 2.07 |

## Supplementary References

1. Peluso S, Mira A, Rue H, et al. A Bayesian spatiotemporal statistical analysis of out-of-hospital cardiac arrests. *Biom J* 2020;62:1105-19.
2. Auricchio A, Peluso S, Caputo ML, et al. Spatio-temporal prediction model of out-of-hospital cardiac arrest: Designation of medical priorities and estimation of human resources requirement. *PLOS ONE* 2020;15:e0238067.
3. Blangiardo M, Cameletti M. Spatial and spatio-temporal Bayesian models with R - INLA. Chichester: Wiley; 2015.
4. Australian Bureau of Statistics. Regional population by age and sex, Australia. (Accessed 15 February 2021, at <https://www.abs.gov.au/AUSSTATS/abs@.nsf/second+level+view?ReadForm&prodno=3235.0&viewtitle=Regional%20Population%20by%20Age%20and%20Sex,%20Australia~2018~Latest~29/08/2019&&tabname=Past%20Future%20Issues&prodno=3235.0&issue=2018&num=&view=&>).
5. Queensland Government Statistician's Office. Queensland population counter. (Accessed 15 February 2021, at <https://www.qgso.qld.gov.au/statistics/theme/population/population-estimates/state-territories/qld-population-counter>).
6. Riebler A, Sørbye SH, Simpson D, Rue H. An intuitive Bayesian spatial model for disease mapping that accounts for scaling. *Stat Methods Med Res* 2016;25:1145-65.
7. Simpson D, Rue H, Riebler A, Martins TG, Sørbye SH. Penalising model component complexity: a principled, practical approach to constructing priors. *Statist Sci* 2017;32:1-28.
8. Rue H, Martino S, Chopin N. Approximate Bayesian inference for latent Gaussian models by using integrated nested Laplace approximations. *J R Statist Soc B* 2009;71: 319-92.
9. Krainski ET, Gómez-Rubio V, Bakka H, et al. Advanced spatial modeling with stochastic partial differential equations using R and INLA. (Accessed 15 February 2021, at <https://becarioprecario.bitbucket.io/spde-gitbook/index.html>).
10. Sparks C. An examination of disparities in cancer incidence in Texas using Bayesian random coefficient models. *PeerJ* 2015;3:e1283.
